# Supplementary material
Source: PubMed Central journal article supplement (PMC3334334)
Supplement: NIHMS365055-supplement-Supporting_Information.pdf [file NIHMS365055-supplement-Supporting_Information.pdf]

Supporting Information

© Wiley-VCH 2012

69451 Weinheim, Germany

**Brønsted Acid-Catalyzed Asymmetric Propargylation of Aldehydes\*\***

*Pankaj Jain, Hao Wang, Kendall N. Houk,\* and Jon C. Antilla\**

anie\_201107407\_sm\_miscellaneous\_information.pdf

## Supporting Information

### Contents:

|                             |         |
|-----------------------------|---------|
| General considerations..... | S2      |
| General procedure.....      | S2      |
| Experimental.....           | S3-S34  |
| Computational data.....     | S35-S41 |
| References.....             | S42     |

**General Considerations:** All reactions were carried out in flame-dried screw-cap test tubes and were allowed to proceed under a dry argon atmosphere with magnetic stirring. Toluene was purified by passing through a column of activated alumina under a dry argon atmosphere. Aldehydes were purchased from commercial sources and were distilled prior to use. TRIP catalyst was prepared from chiral BINOL according to the known literature procedure. Thin layer chromatography was performed on Merck TLC plates (silica gel 60 F<sub>254</sub>). Visualization was accomplished UV light (256 nm), with the combination of ceric ammonium molybdate or potassium permanganate as indicator. Flash column chromatography was performed with Merck silica gel (230-400 mesh). Enantiomeric excess (ee) was determined using a Varian Prostar HPLC with a 210 binary pump and a 335 diode array detector. Optical rotations were performed on a Rudolph Research Analytical Autopol IV polarimeter ( $\lambda$  589) using a 700- $\mu$ L cell with a path length of 1-dm. <sup>1</sup>H NMR and <sup>13</sup>C NMR were recorded on a Varian Inova-400 spectrometer with chemical shifts reported relative to tetramethylsilane (TMS). All the compounds were known compounds and were characterized by comparing their <sup>1</sup>H NMR and <sup>13</sup>C NMR values to the reported values.

**General procedure for the propargylation of aldehydes:** A screw-cap reaction tube loaded with a stir bar and 4 Å MS (100 mg) was evacuated, flame-dried, and back-filled with argon. To this tube was added the (*R*)-TRIP-PA catalyst **PA5** (20 mol %), freshly distilled aldehyde (0.20 mmol) and 1.5 ml of dry toluene. The reaction mixture was then cooled to -20 °C followed by the addition of allenylboronic acid pinacol ester **2** (0.30 mmol), slowly over 30 seconds. The mixture was stirred for 96 hours at this temperature and then directly loaded on to a silica gel column and was purified by flash chromatography using ethyl acetate and hexanes (1 : 9).

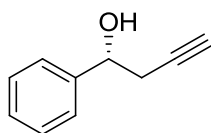

**(R)-1-Phenylbut-3-yn-1-ol (3a):** Following the general procedure for the propargylation of aldehydes in 2 mmol scale (benzaldehyde), the title compound was obtained in 95 % yield with spectral properties reported in literature.<sup>[1]</sup> (94% yield, 91% ee was obtained when the reaction was run at 0.2 mmol scale following the general procedure for propargylation). Enantiomeric excess was determined by HPLC with a chiralcel OD-H column (hexane/iPrOH = 95/5, 1.0 mL/min),  $t_{\text{major}} = 10.49$  min,  $t_{\text{minor}} = 12.81$  min; ee = 95%.  $[\alpha]_{\text{D}}^{25} = +10.10$  ( $c = 0.9$ , MeOH). The reported value<sup>1</sup> for the *R*-enantiomer (98% ee) is  $[\alpha]_{\text{D}}^{24} = +12.9$  ( $c = 1.55$ , MeOH). <sup>1</sup>H NMR (400 MHz, CDCl<sub>3</sub>)  $\delta$  7.44 – 7.21 (m, 5H), 4.86 (td,  $J = 6.5, 2.6$  Hz, 1H), 2.69 – 2.55 (m, 2H), 2.36 (s, 1H), 2.06 (t,  $J = 2.8$  Hz, 1H). <sup>13</sup>C NMR (100.6 MHz, CDCl<sub>3</sub>)  $\delta$  142.39, 128.45, 127.96, 125.70, 80.62, 72.30, 70.94, 29.42.

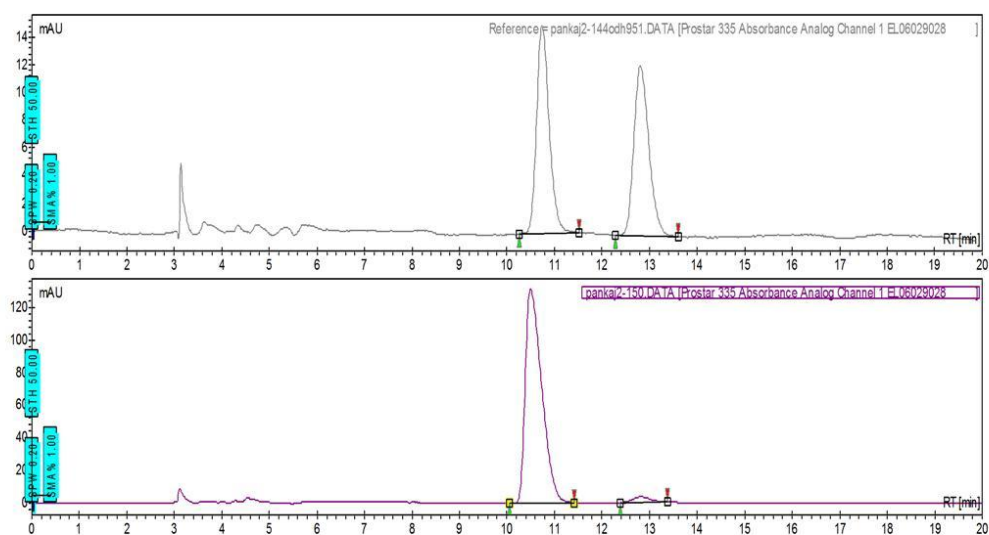

#### Peak results :

pankaj2-144odh951.D [Prostar 335 Absorbance Analog Channel 1 EL06029028 ]

| Index | Time [Min] | Height [mAU] | Width USP [Min] | Area [mAU.Min] | Area % [%] |
|-------|------------|--------------|-----------------|----------------|------------|
| 1     | 10.73      | 15.0         | 0.48            | 4.6            | 50.617     |
| 2     | 12.81      | 12.3         | 0.58            | 4.5            | 49.383     |
| Total |            | 27.3         |                 | 9.2            | 100.000    |

pankaj2-150.D [Prostar 335 Absorbance Analog Channel 1 EL06029028 ]

| Index | Time [Min] | Height [mAU] | Width USP [Min] | Area [mAU.Min] | Area % [%] |
|-------|------------|--------------|-----------------|----------------|------------|
| 1     | 10.49      | 131.1        | 0.65            | 52.6           | 97.538     |
| 2     | 12.81      | 3.3          | 0.65            | 1.3            | 2.462      |
| Total |            | 134.4        |                 | 53.9           | 100.000    |

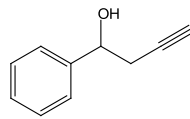

**3a**

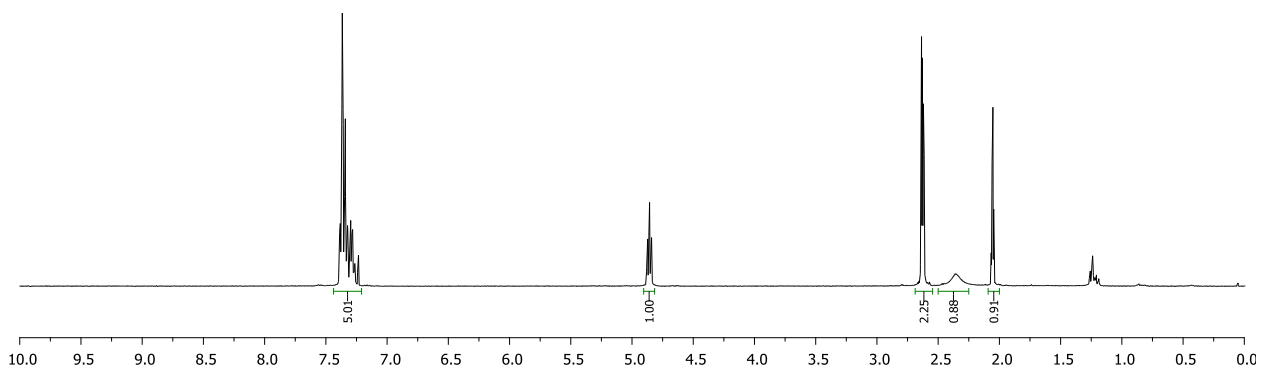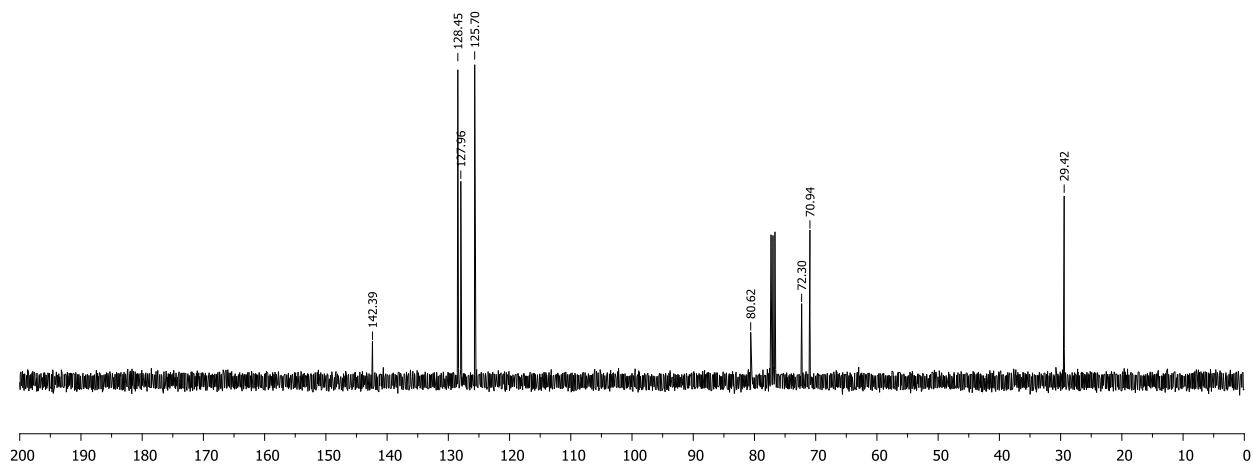

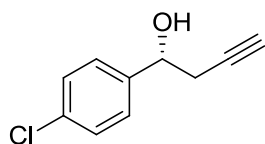

**(R)-1-(4-Chloro-phenyl)-but-3-yn-1-ol (3b):** Following the general procedure for the propargylation of aldehydes, the title compound was obtained in 95 % yield with spectral properties reported in literature.<sup>[2,3]</sup> Enantiomeric excess was determined by HPLC with a chiralcel OD-H column (hexane/iPrOH = 98/2, 1.0 mL/min),  $t_{\text{major}} = 18.56$  min,  $t_{\text{minor}} = 20.32$  min; ee = 93%.  $[\alpha]_{\text{D}}^{25} = +21.50$  (c = 2.7, CHCl<sub>3</sub>). The reported value<sup>3</sup> for the *S*-enantiomer (88% ee) is  $[\alpha]_{\text{D}}^{20} = -35.9$  (c = 1.00, CHCl<sub>3</sub>). <sup>1</sup>H NMR (400 MHz, CDCl<sub>3</sub>) δ 7.27 (s, 4H), 4.83 (td, *J* = 6.5, 3.1 Hz, 1H), 2.69 – 2.51 (m, 2H), 2.40 (d, *J* = 3.3 Hz, 1H), 2.06 (t, *J* = 2.6 Hz, 1H). <sup>13</sup>C NMR (100.6 MHz, CDCl<sub>3</sub>) δ 141.08, 133.91, 128.84, 127.38, 80.39, 71.85, 71.56, 29.70.

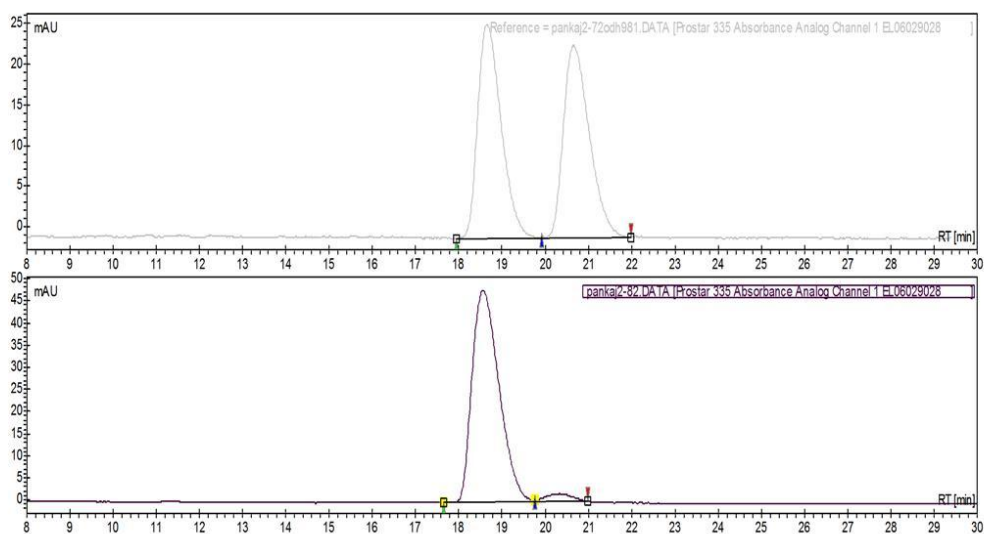

#### Peak results :

pankaj2-72odh981.D [Prostar 335 Absorbance Analog Channel 1 EL06029028 ]

| Index | Time [Min] | Height [mAU] | Width USP [Min] | Area [mAU.Min] | Area % [%] |
|-------|------------|--------------|-----------------|----------------|------------|
| 1     | 18.65      | 26.4         | 0.99            | 16.5           | 50.121     |
| 2     | 20.65      | 23.7         | 1.11            | 16.4           | 49.879     |
| Total |            | 50.0         |                 | 33.0           | 100.000    |

pankaj2-82.D [Prostar 335 Absorbance Analog Channel 1 EL06029028 ]

| Index | Time [Min] | Height [mAU] | Width USP [Min] | Area [mAU.Min] | Area % [%] |
|-------|------------|--------------|-----------------|----------------|------------|
| 1     | 18.56      | 47.9         | 1.17            | 34.8           | 96.283     |
| 2     | 20.32      | 1.9          | 1.12            | 1.3            | 3.717      |
| Total |            | 49.8         |                 | 36.1           | 100.000    |

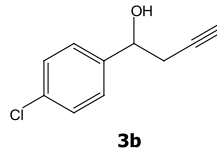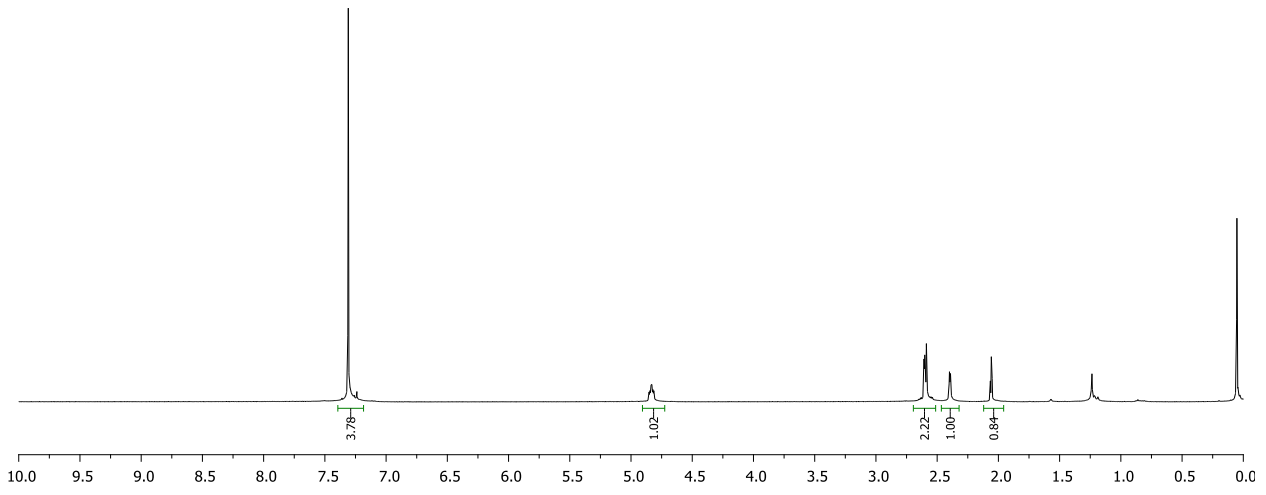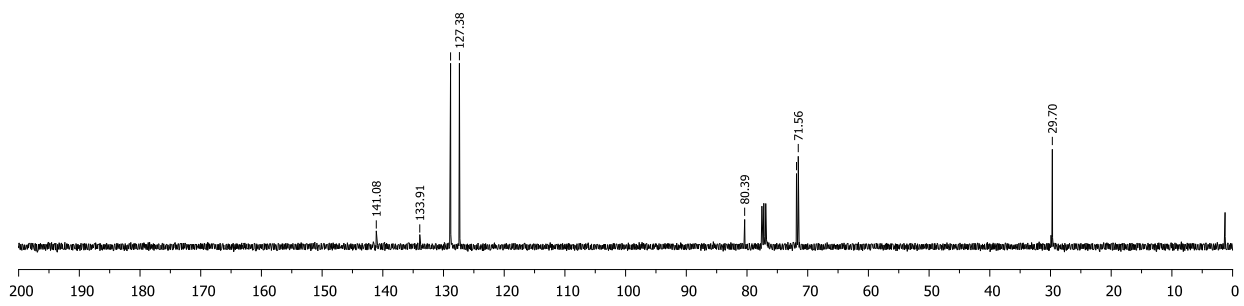

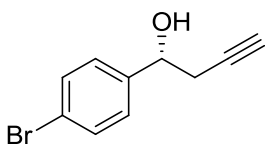

**(R)-1-(4-Bromo-phenyl)-but-3-yn-1-ol (3c):** Following the general procedure for the propargylation of aldehydes, the title compound was obtained in 93 % yield with spectral properties reported in literature.<sup>[4]</sup> Enantiomeric excess was determined by HPLC with a chiralcel OD-H column (hexane/iPrOH = 98/2, 1.0 mL/min),  $t_{\text{major}} = 20.00$  min,  $t_{\text{minor}} = 22.15$  min; ee = 93%.  $[\alpha]_{\text{D}}^{25} = +19.52$  ( $c = 2.15$ ,  $\text{CHCl}_3$ ). The reported value<sup>4</sup> for the *S*-enantiomer (81% ee) is  $[\alpha]_{\text{D}} = -28.4$  ( $c = 1$ ,  $\text{CHCl}_3$ ). <sup>1</sup>H NMR (400 MHz,  $\text{CDCl}_3$ )  $\delta$  7.51-7.36 (m, 2H), 7.29-7.15 (m, 2H), 4.85-4.72 (m, 1H), 2.66-2.50 (m, 2H), 2.37 (br s, 1H), 2.07-1.97 (m, 1H). <sup>13</sup>C NMR (100.6 MHz,  $\text{CDCl}_3$ )  $\delta$  141.59, 131.78, 127.71, 122.03, 80.34, 71.87, 71.58, 29.64.

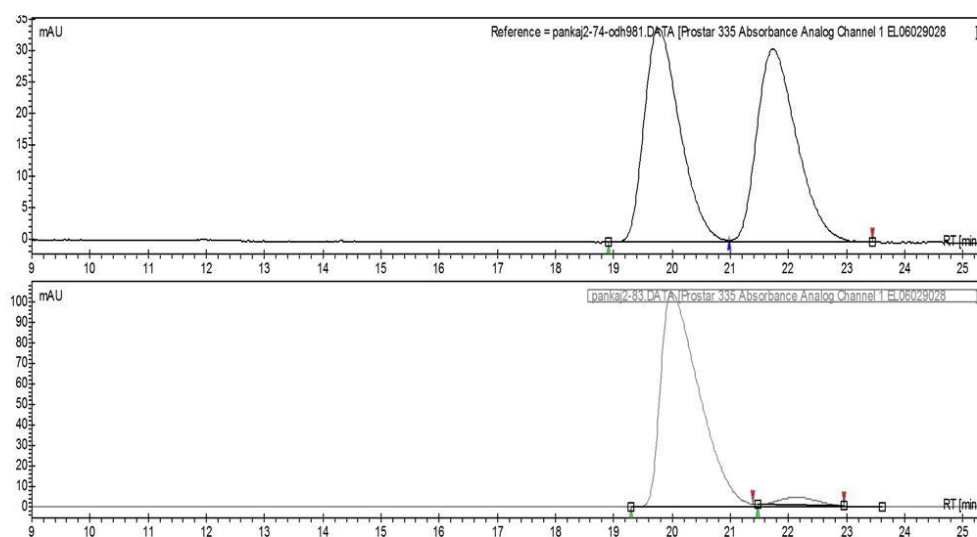

**Peak results :**

pankaj2-74-odh981.D [Prostar 335 Absorbance Analog Channel 1 EL06029028 ]

| Index | Time [Min] | Height [mAU] | Width USP [Min] | Area [mAU.Min] | Area % [%] |
|-------|------------|--------------|-----------------|----------------|------------|
| 1     | 19.77      | 34.0         | 1.13            | 24.1           | 49.766     |
| 2     | 21.73      | 30.7         | 1.26            | 24.4           | 50.234     |
| Total |            | 64.7         |                 | 48.5           | 100.000    |

pankaj2-83.D [Prostar 335 Absorbance Analog Channel 1 EL06029028 ]

| Index | Time [Min] | Height [mAU] | Width USP [Min] | Area [mAU.Min] | Area % [%] |
|-------|------------|--------------|-----------------|----------------|------------|
| 1     | 20.00      | 104.5        | 1.25            | 79.5           | 96.440     |
| 2     | 22.15      | 3.9          | 1.19            | 2.9            | 3.560      |
| Total |            | 108.4        |                 | 82.5           | 100.000    |



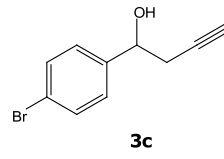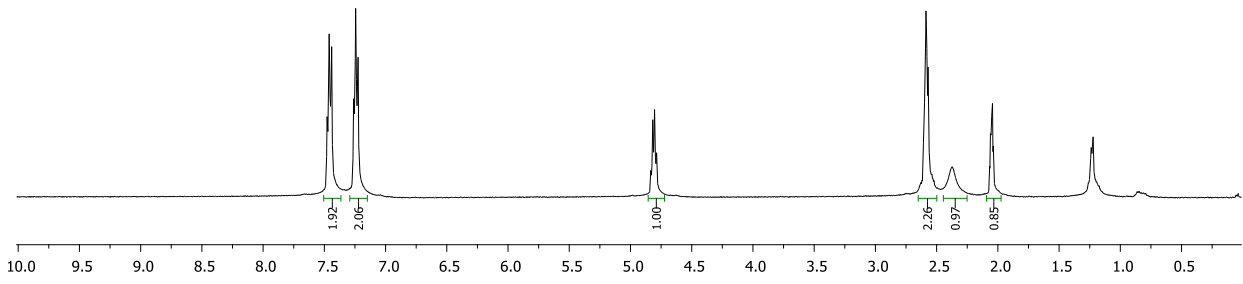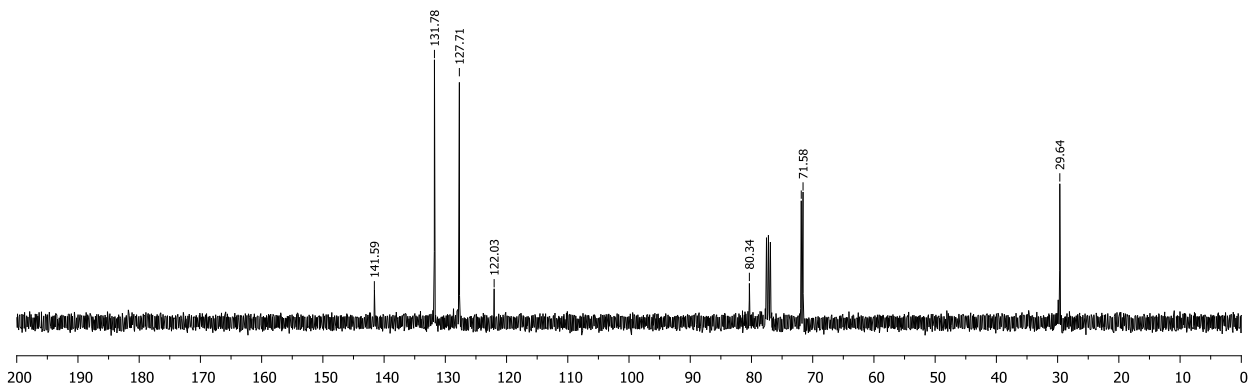

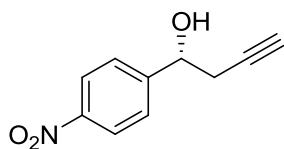

**(R)-1-(4-Nitro-phenyl)-but-3-yn-1-ol (3d):** Following the general procedure for the propargylation of aldehydes, the title compound was obtained in 96 % yield with spectral properties reported in literature.<sup>[5]</sup> Enantiomeric excess was determined by HPLC with a chiralcel OJ-H column (hexane/iPrOH = 90/10, 1.0 mL/min),  $t_{\text{minor}} = 29.81$  min,  $t_{\text{major}} = 32.92$  min; ee = 93%.  $[\alpha]_{\text{D}}^{25} = +3.48$  (c = 0.37, CHCl<sub>3</sub>). The absolute configuration was determined by analogy. <sup>1</sup>H NMR (400 MHz, CDCl<sub>3</sub>) δ 8.32 – 8.09 (m, 2H), 7.68 – 7.45 (m, 2H), 5.02-4.95 (m, 1H), 2.75-2.56 (m, 3H), 2.10 (td, *J* = 2.6, 0.6 Hz, 1H). <sup>13</sup>C NMR (100.6 MHz, CDCl<sub>3</sub>) δ 149.64, 147.79, 126.87, 123.88, 79.57, 72.18, 71.50, 29.70.

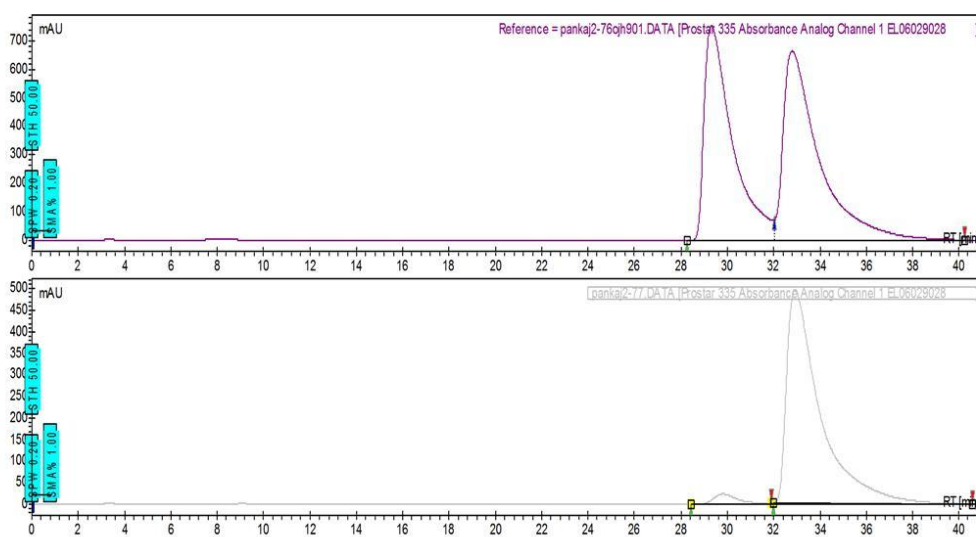

#### Peak results :

pankaj2-76ojh901.DATA [Prostar 335 Absorbance Analog Channel 1 EL06029028 ]

| Index | Time [Min] | Height [mAU] | Width USP [Min] | Area [mAU.Min] | Area % [%] |
|-------|------------|--------------|-----------------|----------------|------------|
| 1     | 29.32      | 752.4        | 2.02            | 1056.8         | 47.010     |
| 2     | 32.80      | 663.0        | 2.44            | 1191.3         | 52.990     |
| Total |            | 1415.4       |                 | 2248.1         | 100.000    |

pankaj2-77.DATA [Prostar 335 Absorbance Analog Channel 1 EL06029028 ]

| Index | Time [Min] | Height [mAU] | Width USP [Min] | Area [mAU.Min] | Area % [%] |
|-------|------------|--------------|-----------------|----------------|------------|
| 1     | 29.81      | 24.1         | 1.85            | 30.8           | 3.579      |
| 2     | 32.92      | 496.6        | 2.26            | 829.6          | 96.421     |
| Total |            | 520.6        |                 | 860.4          | 100.000    |

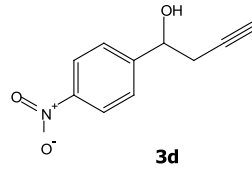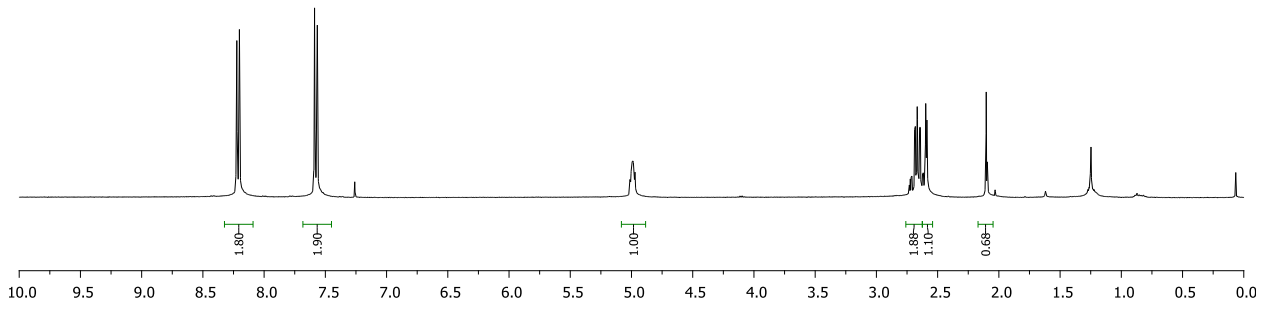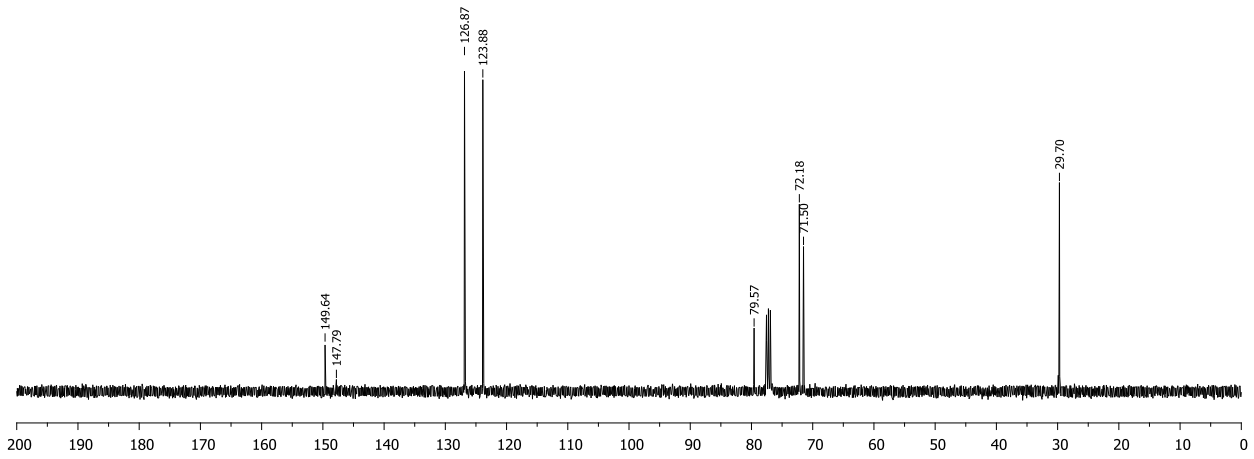

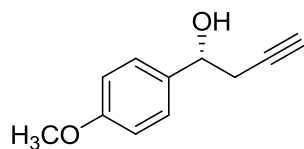

**(R)-1-(4-Methoxy-phenyl)-but-3-yn-1-ol (3e):** Following the general procedure for the propargylation of aldehydes, the title compound was obtained in 87 % yield with spectral properties reported in literature.<sup>[3,4]</sup> Enantiomeric excess was determined by HPLC with a chiralcel OD-H column (hexane/iPrOH = 90/10, 1.0 mL/min),  $t_{\text{major}} = 8.64$  min,  $t_{\text{minor}} = 10.53$  min; ee = 92%.  $[\alpha]_{\text{D}}^{25} = +33.60$  (c = 1.45, CHCl<sub>3</sub>). The reported value<sup>3</sup> for the *S*-enantiomer (89 % ee) is  $[\alpha]_{\text{D}}^{28} = -36.2$  (c = 1, CHCl<sub>3</sub>). <sup>1</sup>H NMR (400 MHz, CDCl<sub>3</sub>)  $\delta$  7.35 – 7.29 (m, 2H), 6.92 – 6.86 (m, 2H), 4.84 (t, *J* = 6.4 Hz, 1H), 3.81 (s, 3H), 2.66-2.60 (m, 2H), 2.30 (br s, 1H), 2.07 (t, *J* = 2.6 Hz, 1H). <sup>13</sup>C NMR (100.6 MHz, CDCl<sub>3</sub>)  $\delta$  159.56, 134.87, 127.23, 114.08, 81.03, 72.21, 71.08, 55.51, 29.61.

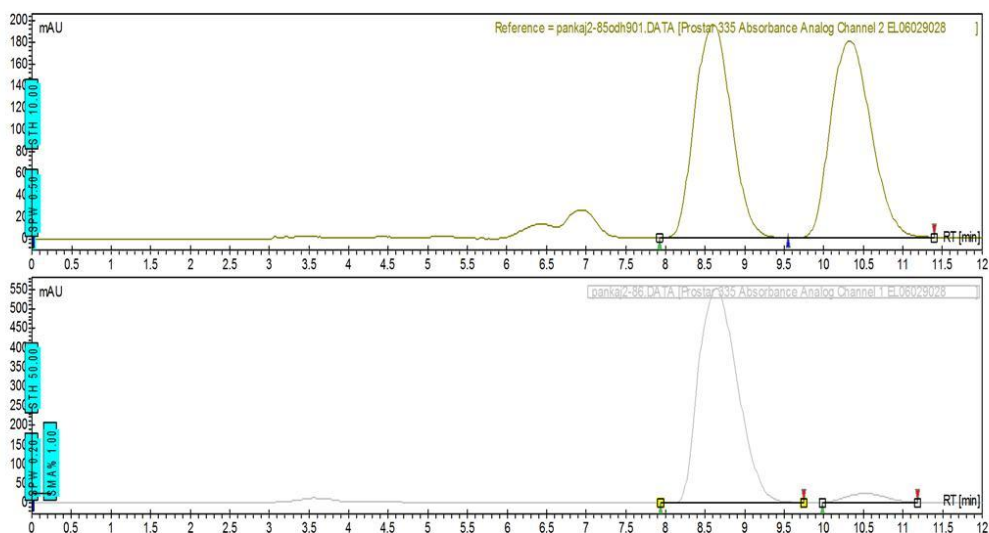

#### Peak results :

pankaj2-85odh901.DATA [Prostar 335 Absorbance Analog Channel 2 EL06029028 ]

| Index | Name    | Time [Min] | Quantity [% Area] | Height [mAU] | Area [mAU.Min] | Area % [%] |
|-------|---------|------------|-------------------|--------------|----------------|------------|
| 1     | UNKNOWN | 8.60       | 49.57             | 195.4        | 104.4          | 49.567     |
| 2     | UNKNOWN | 10.32      | 50.43             | 180.7        | 106.2          | 50.433     |
| Total |         |            | 100.00            | 376.0        | 210.7          | 100.000    |

pankaj2-86.DATA [Prostar 335 Absorbance Analog Channel 1 EL06029028 ]

| Index | Time [Min] | Height [mAU] | Width USP [Min] | Area [mAU.Min] | Area % [%] |
|-------|------------|--------------|-----------------|----------------|------------|
| 1     | 8.64       | 552.8        | 0.90            | 313.2          | 95.840     |
| 2     | 10.53      | 23.3         | 0.94            | 13.6           | 4.160      |
| Total |            |              | 576.1           | 326.8          | 100.000    |

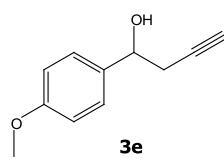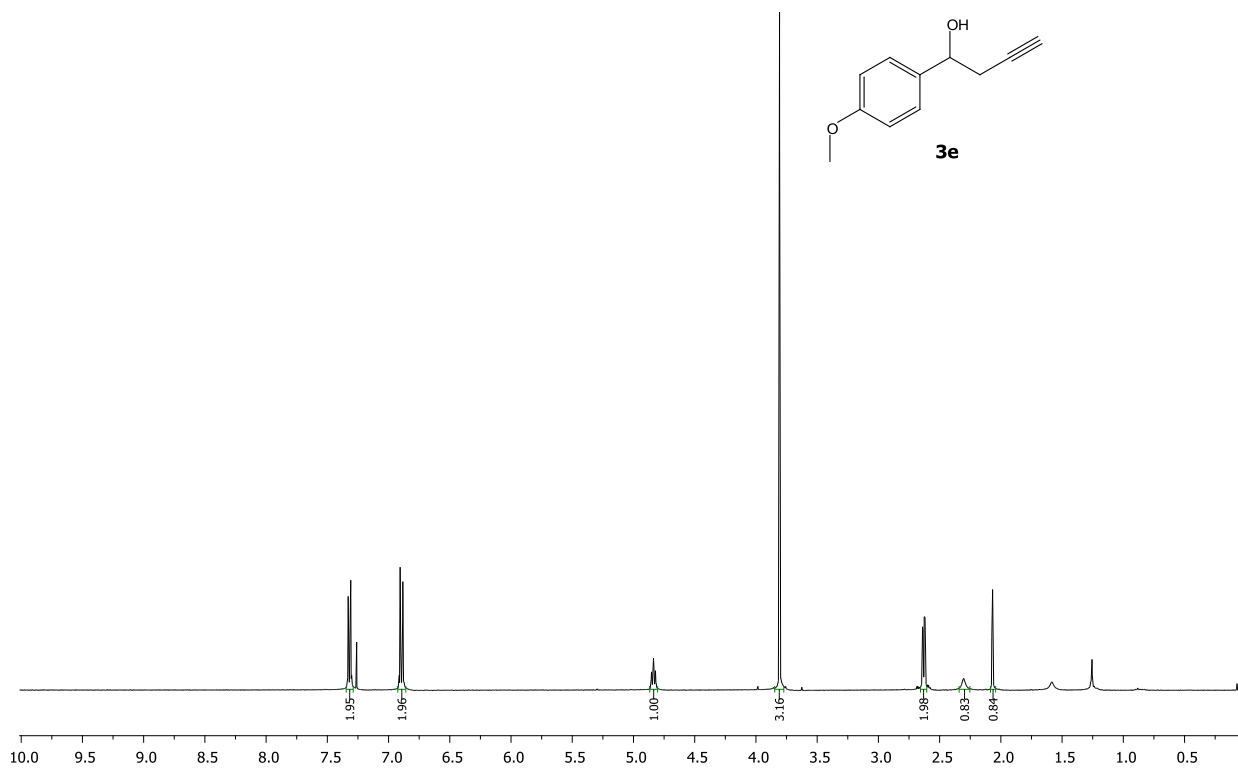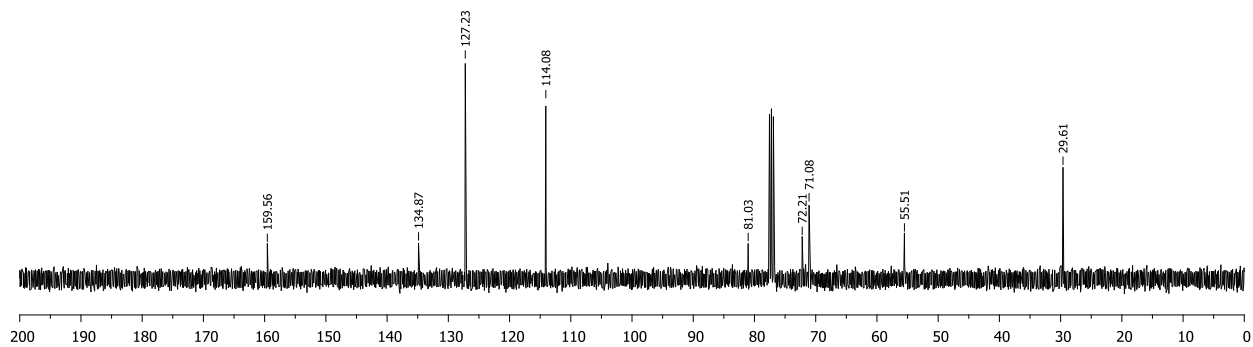

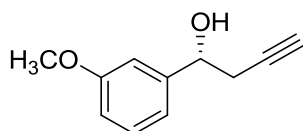

**(R)-1-(3-Methoxy-phenyl)-but-3-yn-1-ol (3f):** Following the general procedure for the propargylation of aldehydes, the title compound was obtained in 92 % yield with spectral properties reported in literature.<sup>[6]</sup> Enantiomeric excess was determined by HPLC with a chiralcel OD-H column (hexane/iPrOH = 98/2, 1.0 mL/min),  $t_{\text{major}} = 34.28$  min,  $t_{\text{minor}} = 39.96$  min; ee = 96%.  $[\alpha]_{\text{D}}^{25} = +7.09$  (c = 0.34, CHCl<sub>3</sub>). The absolute configuration was determined by analogy. <sup>1</sup>H NMR (400 MHz, CDCl<sub>3</sub>)  $\delta$  7.29 – 7.21 (m, 1H), 6.97 – 6.90 (m, 2H), 6.82 (ddd,  $J = 8.2, 2.4, 1.1$  Hz, 1H), 4.83 (td,  $J = 6.4, 3.4$  Hz, 1H), 3.80 (s, 3H), 2.64 – 2.59 (m, 2H), 2.38 (d,  $J = 3.5$  Hz, 1H), 2.06 (t,  $J = 2.6$  Hz, 1H). <sup>13</sup>C NMR (100.6 MHz, CDCl<sub>3</sub>)  $\delta$  159.95, 144.35, 129.74, 118.22, 113.68, 111.49, 80.86, 72.46, 71.21, 55.45, 29.65.

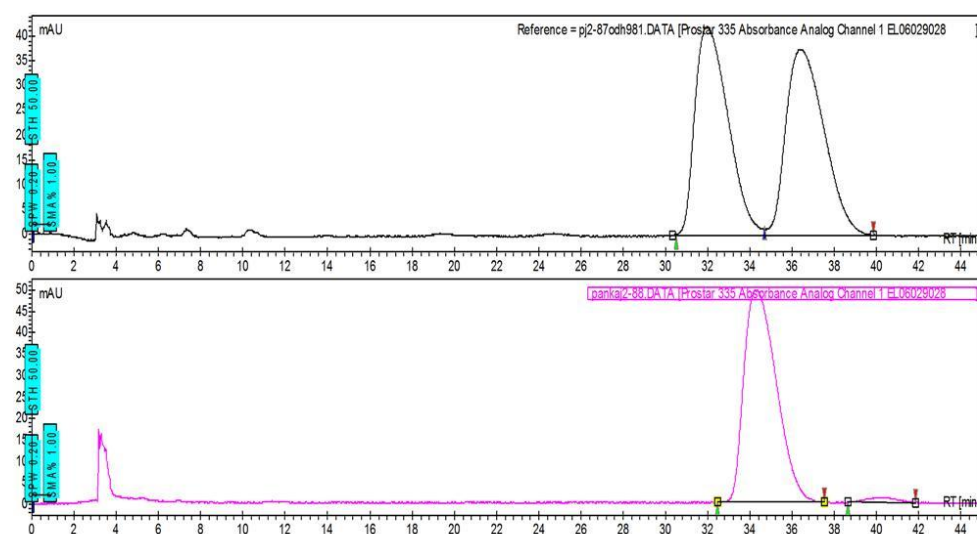

#### Peak results :

pj2-870dh981.D [Prostar 335 Absorbance Analog Channel 1 EL06029028 ]

| Index | Time [Min] | Height [mAU] | Width USP [Min] | Area [mAU.Min] | Area % [%] |
|-------|------------|--------------|-----------------|----------------|------------|
| 1     | 31.96      | 42.2         | 2.87            | 77.0           | 49.355     |
| 2     | 36.39      | 37.6         | 3.28            | 79.0           | 50.645     |
| Total |            | 79.8         |                 | 156.0          | 100.000    |

pankaj2-88.D [Prostar 335 Absorbance Analog Channel 1 EL06029028 ]

| Index | Time [Min] | Height [mAU] | Width USP [Min] | Area [mAU.Min] | Area % [%] |
|-------|------------|--------------|-----------------|----------------|------------|
| 1     | 34.28      | 49.5         | 2.79            | 87.9           | 97.997     |
| 2     | 39.96      | 1.1          | 1.82            | 1.8            | 2.003      |
| Total |            | 50.6         |                 | 89.7           | 100.000    |

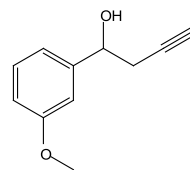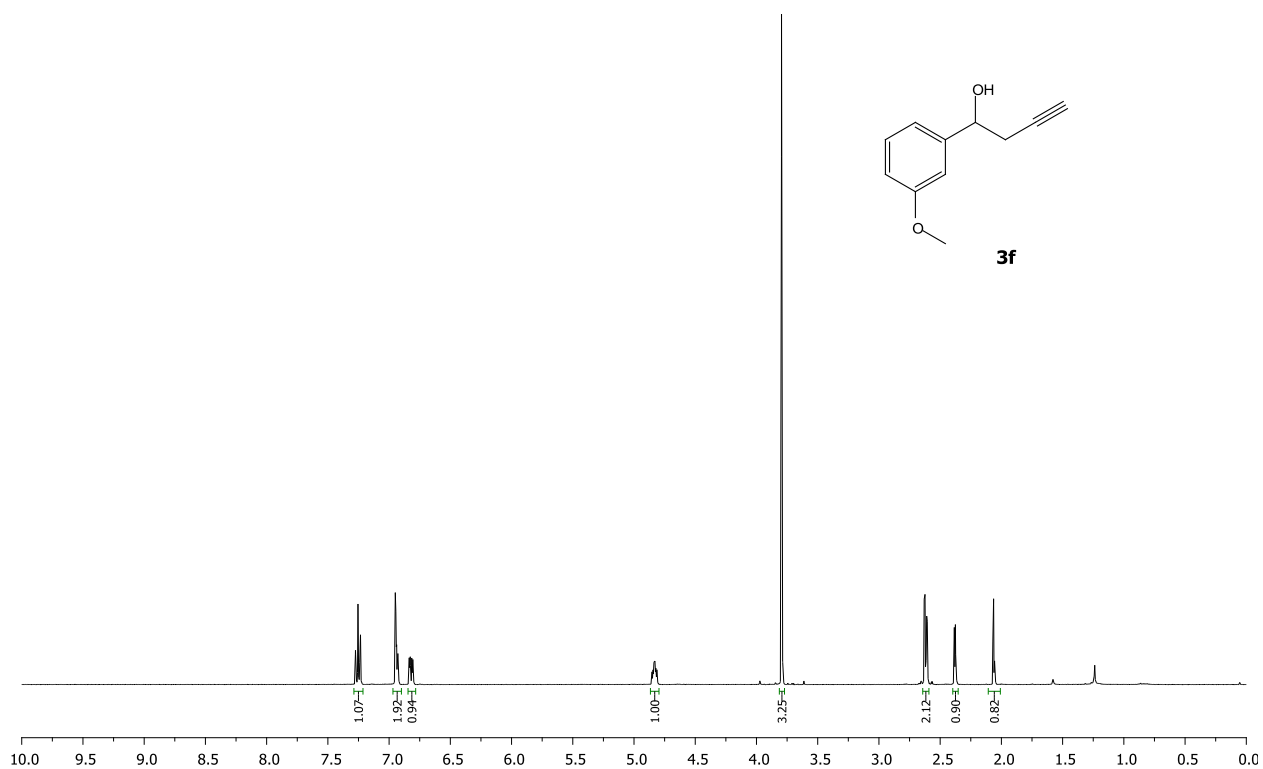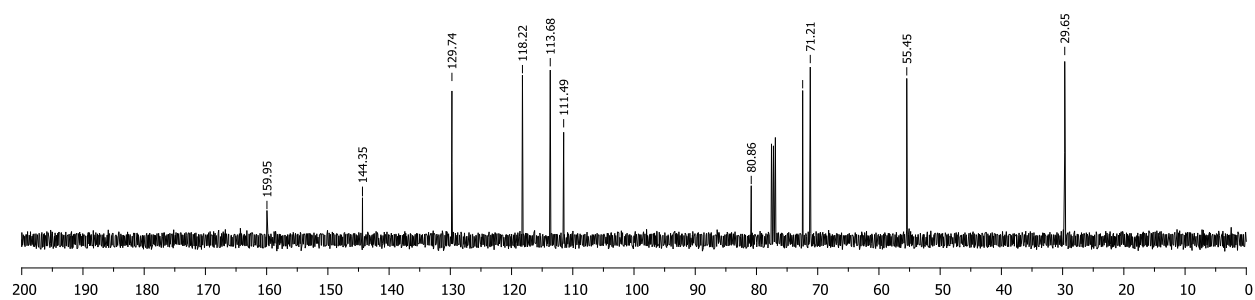

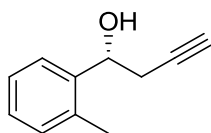

**(R)-1-*o*-Tolyl-but-3-yn-1-ol (3g):** Following the general procedure for the propargylation of aldehydes, the title compound was obtained in 91 % yield with spectral properties reported in literature.<sup>[4]</sup> Enantiomeric excess was determined by HPLC with a chiralcel AD-H column (hexane/*i*PrOH = 98/2, 1.0 mL/min),  $t_{\text{major}} = 16.61$  min,  $t_{\text{minor}} = 21.21$  min; ee = 92%.  $[\alpha]_{\text{D}}^{25} = +35.57$  ( $c = 1.96$ ,  $\text{CHCl}_3$ ). The reported value<sup>4</sup> for the *S*-enantiomer (89 % ee) is  $[\alpha]_{\text{D}}^{25} = -63.2$  ( $c = 0.58$ ,  $\text{CHCl}_3$ ). <sup>1</sup>H NMR (400 MHz,  $\text{CDCl}_3$ )  $\delta$  7.50 (d,  $J = 7.4$  Hz, 1H), 7.26-7.20 (m, 3H), 5.10 (dd,  $J = 7.3, 5.4$  Hz, 1H), 2.62 – 2.57 (m, 2H), 2.35 (s, 3H), 2.32 (br s, 1H), 2.07 (td,  $J = 2.6, 0.8$  Hz, 1H). <sup>13</sup>C NMR (100.6 MHz,  $\text{CDCl}_3$ )  $\delta$  140.69, 134.80, 130.66, 127.96, 126.55, 125.27, 81.13, 70.97, 69.10, 28.48, 19.27.

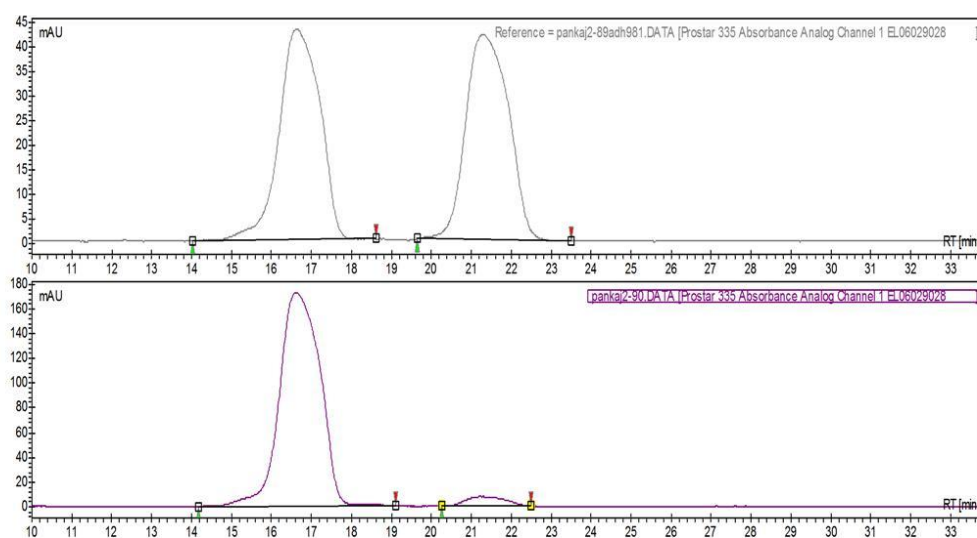

#### Peak results :

pankaj2-89adh981.DATA [Prostar 335 Absorbance Analog Channel 1 EL06029028 ]

| Index | Time [Min] | Height [mAU] | Width USP [Min] | Area [mAU.Min] | Area % [%] |
|-------|------------|--------------|-----------------|----------------|------------|
| 1     | 16.63      | 42.8         | 1.78            | 51.2           | 49.591     |
| 2     | 21.28      | 41.8         | 1.86            | 52.0           | 50.409     |
| Total |            | 84.6         |                 | 103.2          | 100.000    |

pankaj2-90.DATA [Prostar 335 Absorbance Analog Channel 1 EL06029028 ]

| Index | Time [Min] | Height [mAU] | Width USP [Min] | Area [mAU.Min] | Area % [%] |
|-------|------------|--------------|-----------------|----------------|------------|
| 2     | 16.61      | 172.5        | 1.74            | 203.0          | 95.766     |
| 1     | 21.21      | 7.6          | 1.73            | 9.0            | 4.234      |
| Total |            | 180.1        |                 | 212.0          | 100.000    |



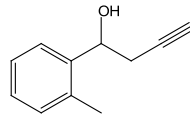

**3g**

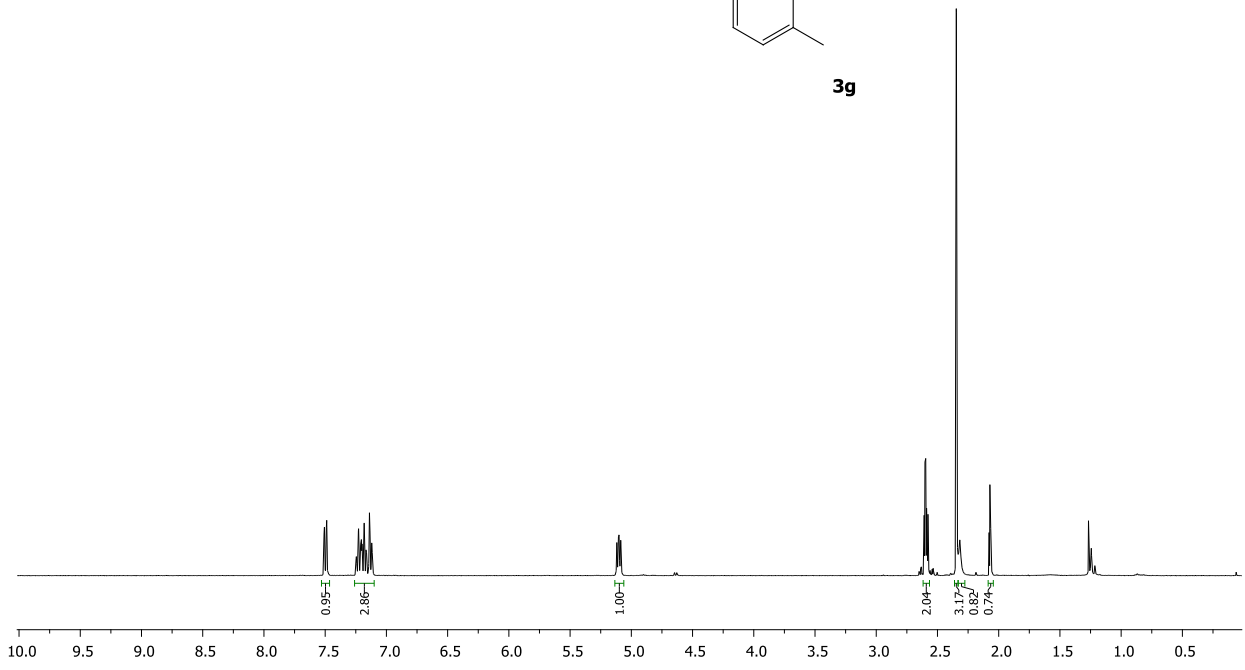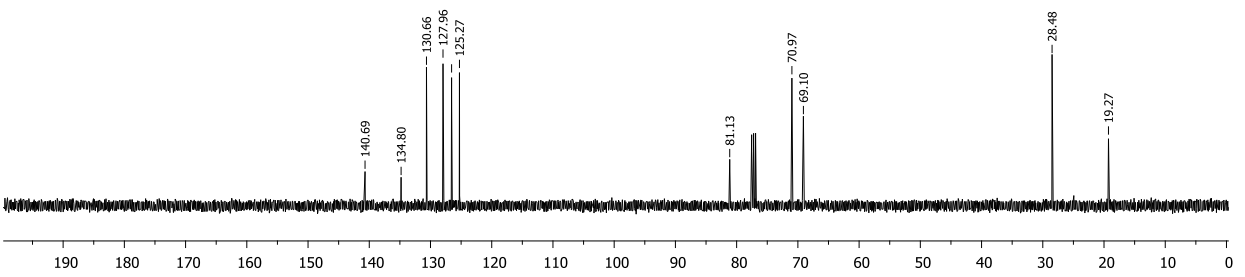

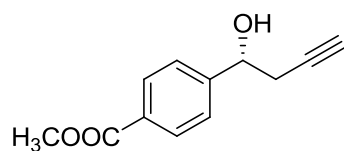

**(R)-Methyl 4-(1-hydroxybut-3-ynyl)benzoate (3h):** Following the general procedure for the propargylation of aldehydes, the title compound was obtained in 94 % yield with spectral properties reported in literature.<sup>[7]</sup> Enantiomeric excess was determined by HPLC with a chiralcel OD-H column (hexane/iPrOH = 90/10, 1.0 mL/min),  $t_{\text{major}} = 11.67$  min,  $t_{\text{minor}} = 16.43$  min; ee = 91%.  $[\alpha]_{\text{D}}^{25} = +33.33$  (c = 2.04, CHCl<sub>3</sub>). The absolute configuration was determined by analogy. <sup>1</sup>H NMR (400 MHz, CDCl<sub>3</sub>) δ 8.01 (d, *J* = 8.1 Hz, 2H), 7.45 (d, *J* = 8.3 Hz, 2H), 4.97 – 4.86 (m, 1H), 3.90 (d, *J* = 0.7 Hz, 3H), 2.76 – 2.50 (m, 3H), 2.07 (td, *J* = 2.6, 0.7 Hz, 1H). <sup>13</sup>C NMR (100.6 MHz, CDCl<sub>3</sub>) δ 167.06, 147.63, 129.96, 129.88, 125.94, 80.24, 72.03, 71.60, 52.34, 29.60.

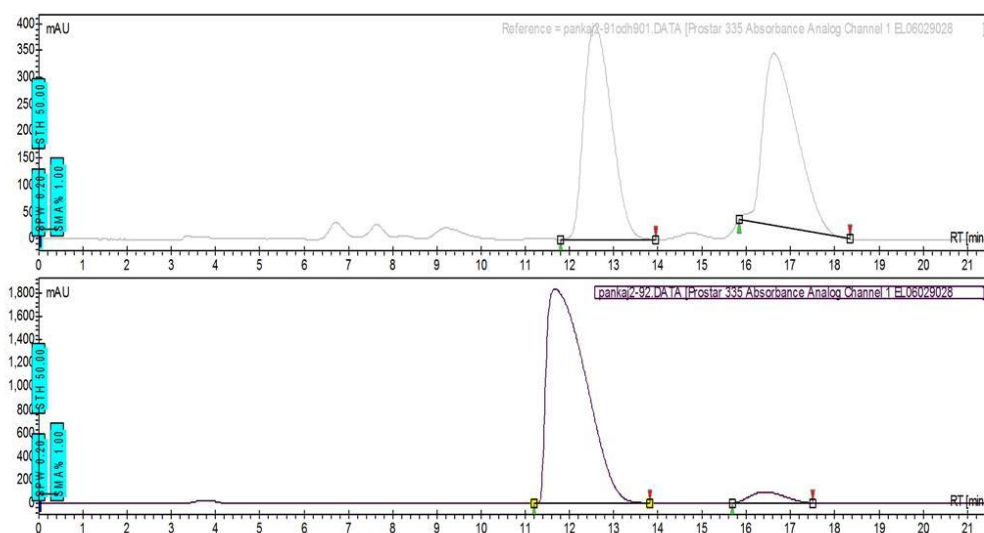

#### Peak results :

pankaj2-910dh901.DATA [Prostar 335 Absorbance Analog Channel 1 EL06029028 ]

| Index | Time [Min] | Height [mAU] | Width USP [Min] | Area [mAU.Min] | Area % [%] |
|-------|------------|--------------|-----------------|----------------|------------|
| 1     | 12.57      | 398.0        | 1.16            | 286.6          | 49.826     |
| 2     | 16.63      | 320.7        | 1.47            | 288.6          | 50.174     |
| Total |            | 718.7        |                 | 575.3          | 100.000    |

pankaj2-92.DATA [Prostar 335 Absorbance Analog Channel 1 EL06029028 ]

| Index | Time [Min] | Height [mAU] | Width USP [Min] | Area [mAU.Min] | Area % [%] |
|-------|------------|--------------|-----------------|----------------|------------|
| 1     | 11.67      | 1834.5       | 1.61            | 1872.0         | 95.568     |
| 2     | 16.43      | 94.4         | 1.47            | 86.8           | 4.432      |
| Total |            | 1928.9       |                 | 1958.8         | 100.000    |

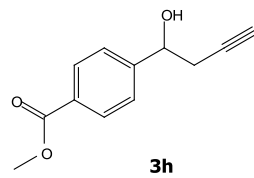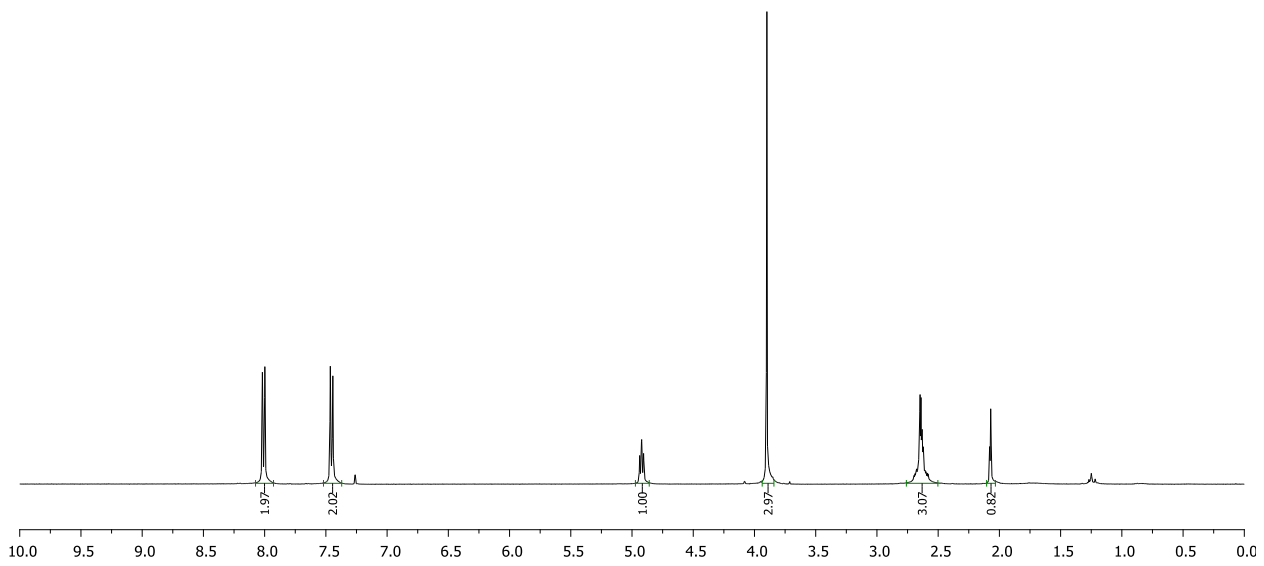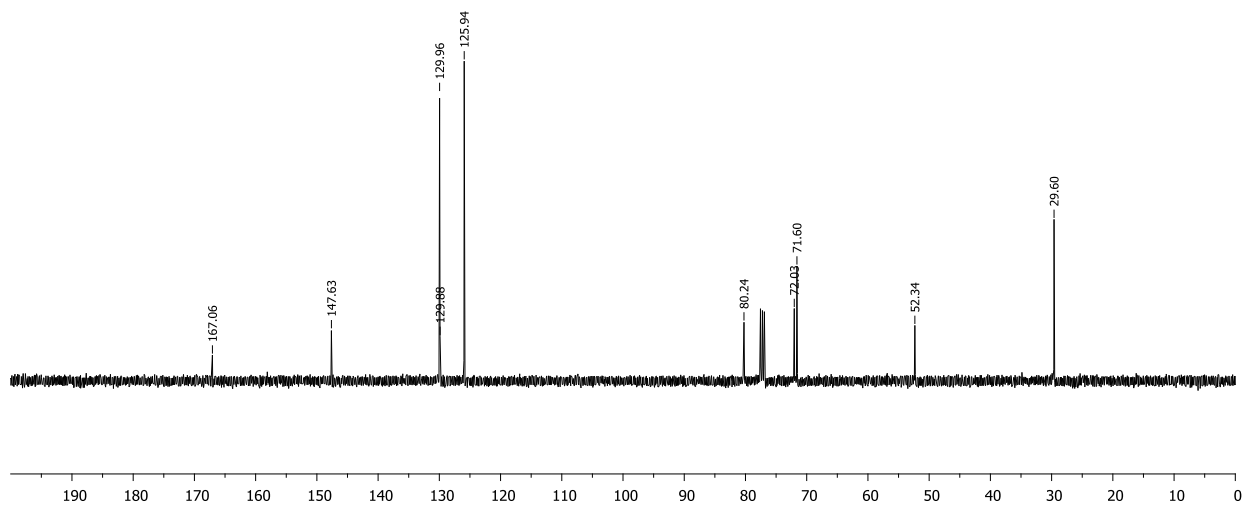

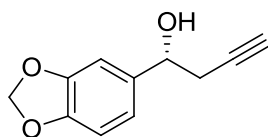

**(R)-1-(Benzo[d][1,3]dioxol-5-yl)but-3-yn-1-ol (3i):** Following the general procedure for the propargylation of aldehydes, the title compound was obtained in 92 % yield with spectral properties reported in literature.<sup>[8]</sup> Enantiomeric excess was determined by HPLC with a chiralcel OD-H column (hexane/iPrOH = 95/5, 1.0 mL/min),  $t_{\text{major}} = 15.99$  min,  $t_{\text{minor}} = 21.40$  min; ee = 94%.  $[\alpha]_{\text{D}}^{25} = +3.91$  (c = 1.70,  $\text{CHCl}_3$ ). The absolute configuration was determined by analogy.  $^1\text{H}$  NMR (400 MHz,  $\text{CDCl}_3$ )  $\delta$  6.96 – 6.72 (m, 3H), 5.95 (s, 2H), 4.79 (td,  $J = 6.4, 3.0$  Hz, 1H), 2.60 (dd,  $J = 6.6, 2.6$  Hz, 2H), 2.33 (d,  $J = 3.2$  Hz, 1H), 2.08 (t,  $J = 2.6$  Hz, 1H).  $^{13}\text{C}$  NMR (100.6 MHz,  $\text{CDCl}_3$ )  $\delta$  148.07, 147.56, 136.82, 119.54, 108.40, 106.58, 101.36, 80.90, 72.50, 71.30, 29.79.

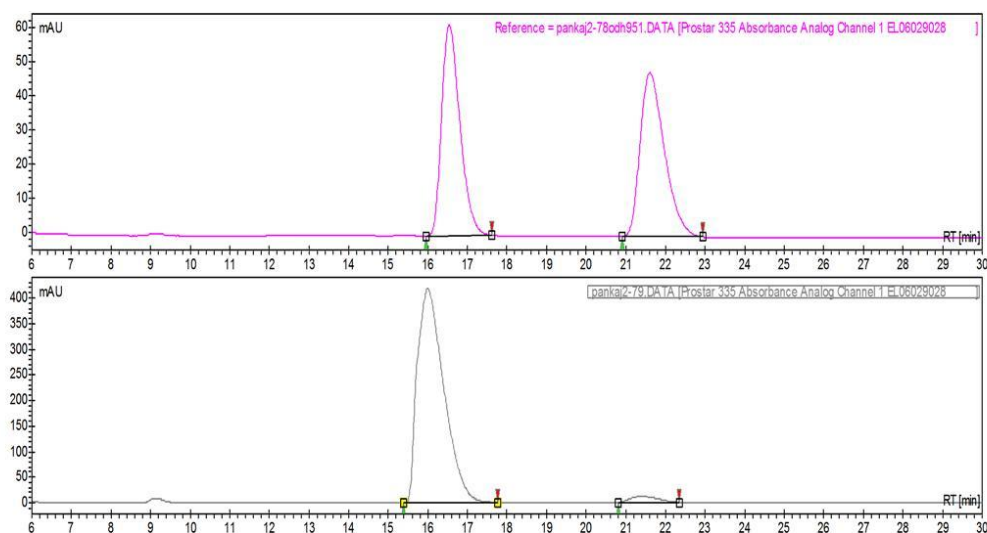

#### Peak results :

pankaj2-78odh951.DATA [Prostar 335 Absorbance Analog Channel 1 EL06029028 ]

| Index | Time [Min] | Height [mAU] | Width USP [Min] | Area [mAU.Min] | Area % [%] |
|-------|------------|--------------|-----------------|----------------|------------|
| 1     | 16.53      | 61.8         | 0.85            | 33.0           | 49.412     |
| 2     | 21.61      | 47.9         | 1.11            | 33.8           | 50.588     |
| Total |            | 109.7        |                 | 66.8           | 100.000    |

pankaj2-79.DATA [Prostar 335 Absorbance Analog Channel 1 EL06029028 ]

| Index | Time [Min] | Height [mAU] | Width USP [Min] | Area [mAU.Min] | Area % [%] |
|-------|------------|--------------|-----------------|----------------|------------|
| 1     | 15.99      | 418.9        | 1.23            | 324.8          | 97.100     |
| 2     | 21.40      | 12.0         | 1.30            | 9.7            | 2.900      |
| Total |            | 430.8        |                 | 334.5          | 100.000    |

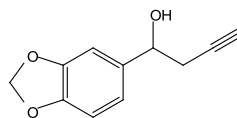

**3i**

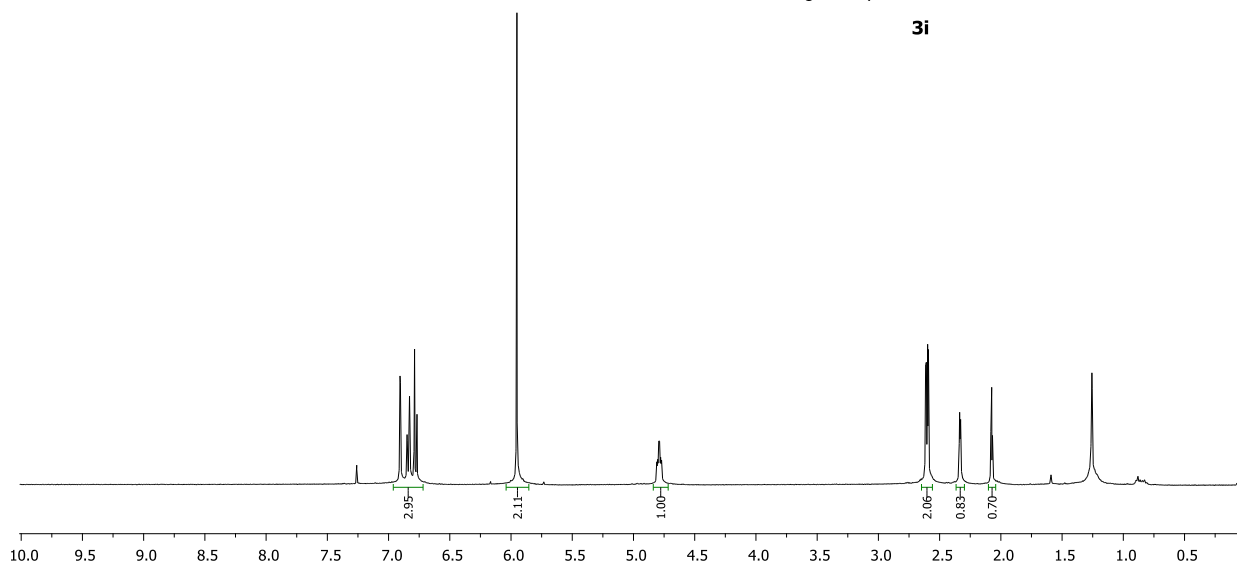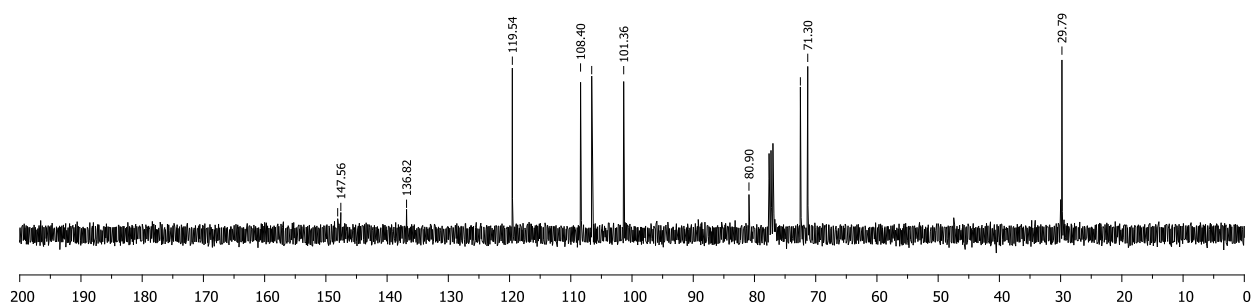

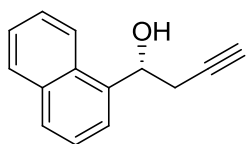

**(R)-1-(Naphthalen-1-yl)but-3-yn-1-ol (3j):** Following the general procedure for the propargylation of aldehydes, the title compound was obtained in 93 % yield with spectral properties reported in literature.<sup>[3,9]</sup> Enantiomeric excess was determined by HPLC with a chiralcel OJ-H column (hexane/iPrOH = 90/10, 1.0 mL/min),  $t_{\text{minor}} = 19.52$  min,  $t_{\text{major}} = 24.85$  min; ee = 91%.  $[\alpha]_{\text{D}}^{25} = +60.64$  (c = 1.96, PhH). The reported value<sup>3</sup> for the *S*-enantiomer (84 % ee) is  $[\alpha]_{\text{D}}^{28} = -53.2$  (c = 1, PhH). <sup>1</sup>H NMR (400 MHz, CDCl<sub>3</sub>)  $\delta$  8.07 (d,  $J = 8.3$  Hz, 1H), 7.92 – 7.78 (m, 2H), 7.72 (d,  $J = 7.1$  Hz, 1H), 7.58 – 7.45 (m, 3H), 5.67 (dd,  $J = 8.1, 4.0$  Hz, 1H), 2.95-2.85 (m, 1H), 2.81-2.71 (m, 1H), 2.56 (br s, 1H), 2.15 (t,  $J = 2.4$  Hz, 1H). <sup>13</sup>C NMR (100.6 MHz, CDCl<sub>3</sub>)  $\delta$  138.00, 133.99, 130.39, 129.25, 128.70, 126.50, 125.85, 125.61, 123.17, 122.97, 81.17, 71.46, 69.51, 28.90.

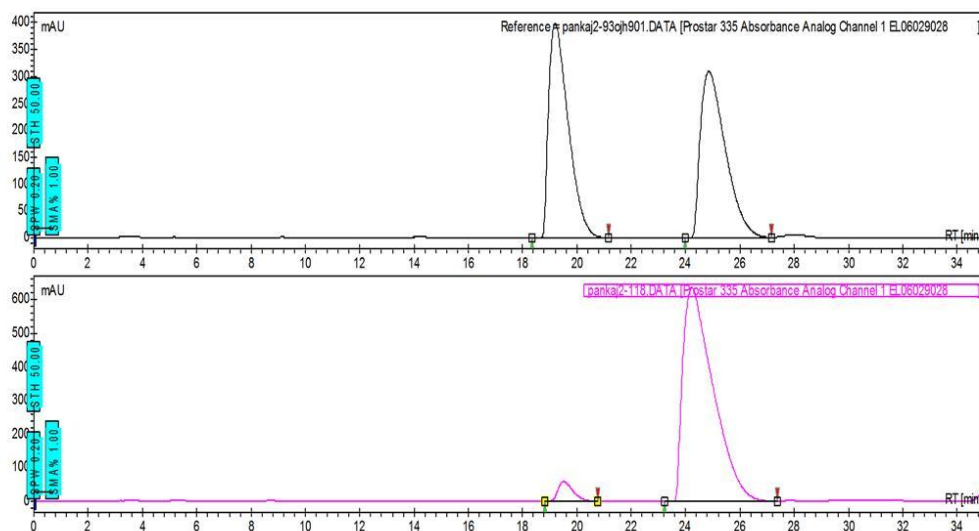

#### Peak results :

pankaj2-93ojh901.DATA [Prostar 335 Absorbance Analog Channel 1 EL06029028 ]

| Index | Time [Min] | Height [mAU] | Width USP [Min] | Area [mAU.Min] | Area % [%] |
|-------|------------|--------------|-----------------|----------------|------------|
| 1     | 19.20      | 398.5        | 1.34            | 333.1          | 50.236     |
| 2     | 24.85      | 308.8        | 1.69            | 330.0          | 49.764     |
| Total |            | 707.3        |                 | 663.0          | 100.000    |

pankaj2-118.DATA [Prostar 335 Absorbance Analog Channel 1 EL06029028 ]

| Index | Time [Min] | Height [mAU] | Width USP [Min] | Area [mAU.Min] | Area % [%] |
|-------|------------|--------------|-----------------|----------------|------------|
| 1     | 19.52      | 59.0         | 1.00            | 37.5           | 4.387      |
| 2     | 24.23      | 637.3        | 2.11            | 818.4          | 95.613     |
| Total |            | 696.3        |                 | 855.9          | 100.000    |

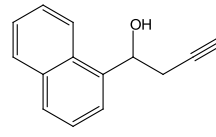

**3j**

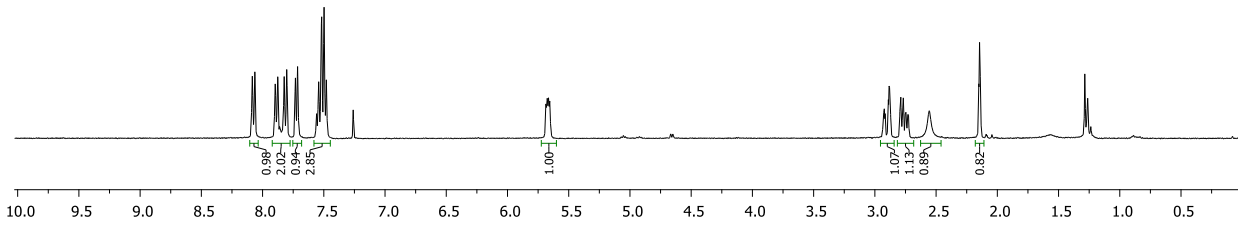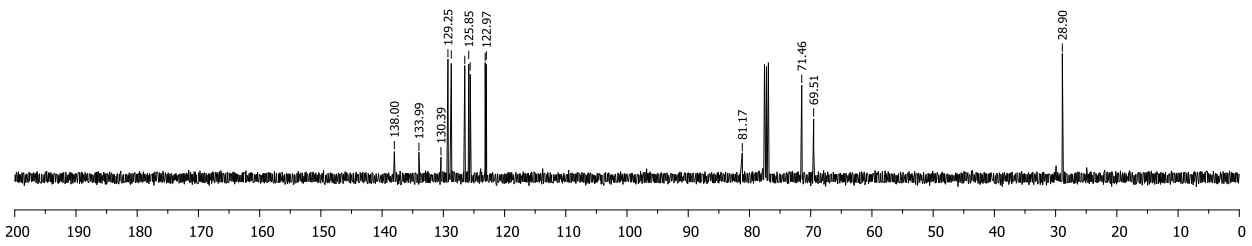

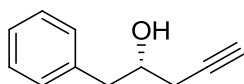

**(R)-1-Phenylpent-4-yn-2-ol (3k):** Following the general procedure for the propargylation of aldehydes, the title compound was obtained in 90 % yield with spectral properties reported in literature.<sup>[8]</sup> Enantiomeric excess was determined by HPLC with a chiralcel OD-H column (hexane/iPrOH = 99/1, 1.0 mL/min),  $t_{\text{minor}} = 20.80$  min,  $t_{\text{major}} = 23.85$  min; ee = 79%.  $[\alpha]_{\text{D}}^{25} = +0.53$  (c = 0.55, CHCl<sub>3</sub>). The absolute configuration was determined by analogy. <sup>1</sup>H NMR (400 MHz, CDCl<sub>3</sub>) δ 7.38 – 7.13 (m, 5H), 4.06 – 3.88 (m, 1H), 2.95-2.78 (m, 2H), 2.49 – 2.30 (m, 2H), 2.09 (t, *J* = 2.7 Hz, 1H), 1.95 (d, *J* = 4.4 Hz, 1H). <sup>13</sup>C NMR (100.6 MHz, CDCl<sub>3</sub>) δ 137.87, 129.61, 128.83, 126.90, 80.82, 71.33, 71.03, 42.70, 26.64.

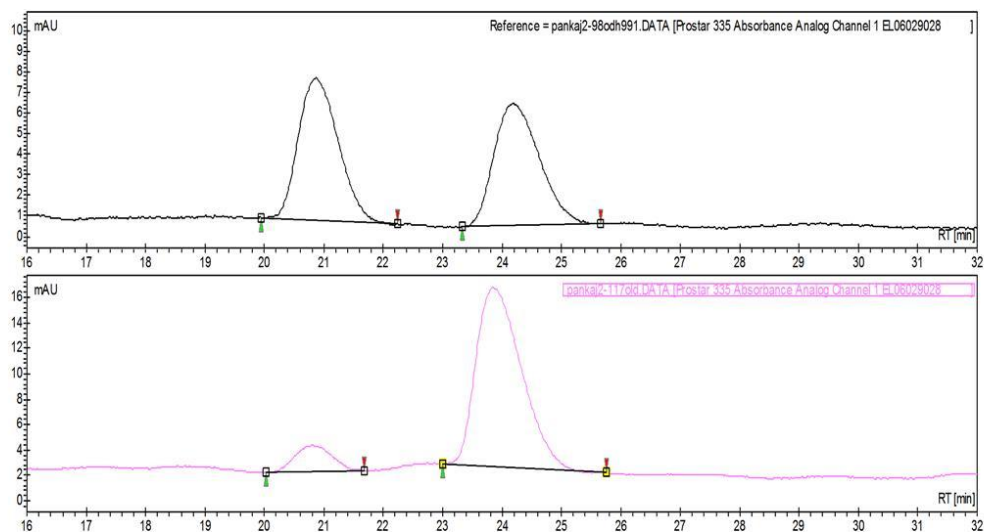

#### Peak results :

pankaj2-980dh991.DAT [Prostar 335 Absorbance Analog Channel 1 EL06029028 ]

| Index | Time [Min] | Height [mAU] | Width USP [Min] | Area [mAU.Min] | Area % [%] |
|-------|------------|--------------|-----------------|----------------|------------|
| 1     | 20.87      | 6.9          | 1.23            | 5.3            | 50.579     |
| 2     | 24.19      | 5.9          | 1.39            | 5.2            | 49.421     |
| Total |            | 12.8         |                 | 10.6           | 100.000    |

pankaj2-1170d.DAT [Prostar 335 Absorbance Analog Channel 1 EL06029028 ]

| Index | Time [Min] | Height [mAU] | Width USP [Min] | Area [mAU.Min] | Area % [%] |
|-------|------------|--------------|-----------------|----------------|------------|
| 1     | 20.80      | 2.1          | 1.23            | 1.5            | 10.640     |
| 2     | 23.85      | 14.1         | 1.42            | 12.5           | 89.360     |
| Total |            | 16.1         |                 | 13.9           | 100.000    |



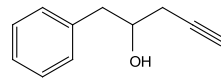

**3k**

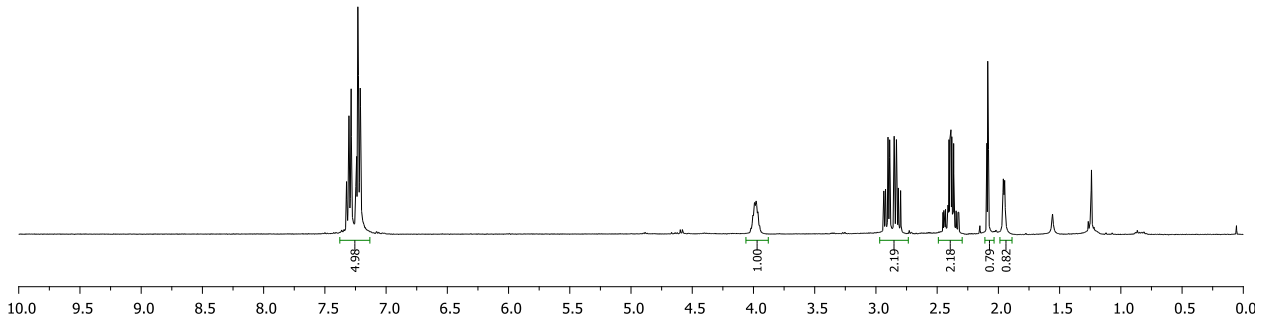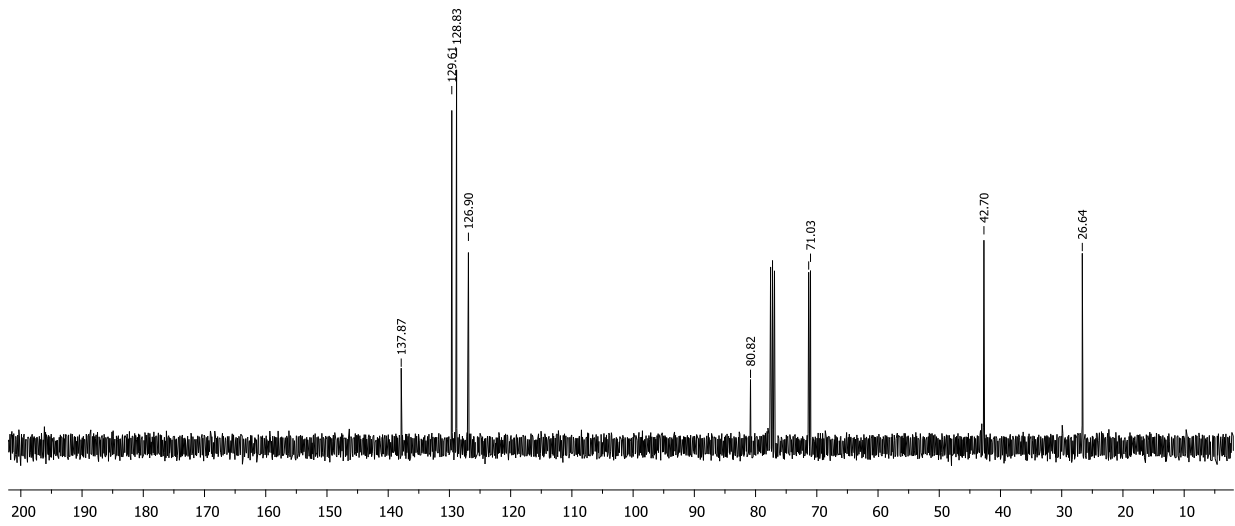

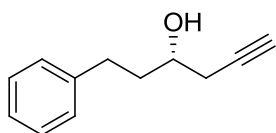

**(S)-1-Phenylhex-5-yn-3-ol (31):** Following the general procedure for the propargylation of aldehydes, the title compound was obtained in 92 % yield with spectral properties reported in literature.<sup>[10]</sup> Enantiomeric excess was determined by HPLC with a chiralcel OD-H column (hexane/iPrOH = 90/10, 1.0 mL/min),  $t_{\text{major}} = 6.97$  min,  $t_{\text{minor}} = 9.67$  min; ee = 82 %.  $[\alpha]_{\text{D}}^{25} = -13.51$  ( $c = 1.38$ ,  $\text{CHCl}_3$ ). The reported value<sup>3</sup> for the *R*-enantiomer (42 % ee) is  $[\alpha]_{\text{D}}^{28} = +8.70$  ( $c = 0.4$ ,  $\text{CHCl}_3$ ). <sup>1</sup>H NMR (400 MHz,  $\text{CDCl}_3$ )  $\delta$  7.37 – 7.08 (m, 5H), 3.83-3.70 (m, 1H), 2.86-2.63 (m, 2H), 2.50 – 2.24 (m, 2H), 2.05 (t,  $J = 2.6$  Hz, 1H), 1.96 (d,  $J = 5.2$  Hz, 1H), 1.90-1.82 (m, 2H). <sup>13</sup>C NMR (100.6 MHz,  $\text{CDCl}_3$ )  $\delta$  141.84, 128.65, 128.63, 126.14, 80.85, 71.22, 69.32, 37.99, 32.10, 27.72.

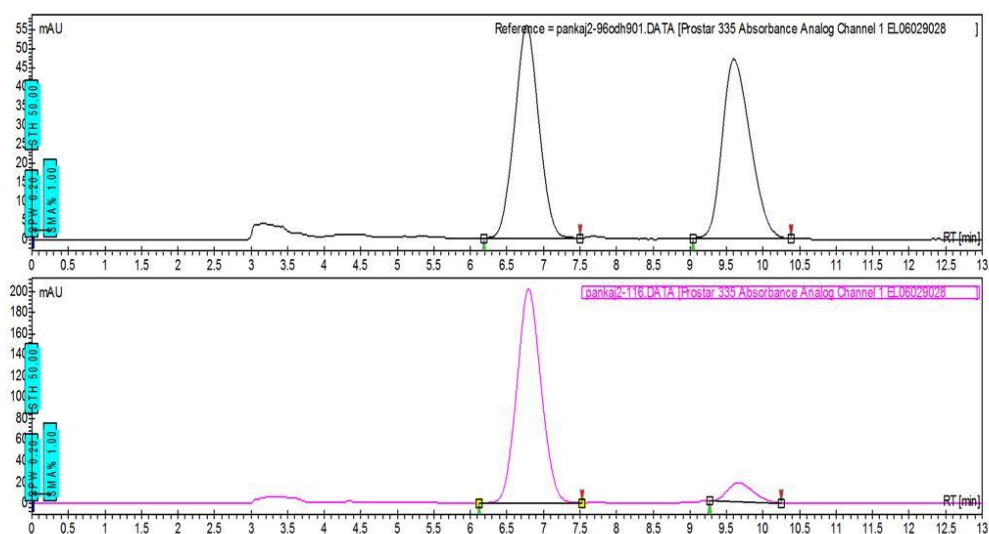

#### Peak results :

pankaj2-96odh901.D [Prostar 335 Absorbance Analog Channel 1 EL06029028 ]

| Index | Time [Min] | Height [mAU] | Width USP [Min] | Area [mAU.Min] | Area % [%] |
|-------|------------|--------------|-----------------|----------------|------------|
| 1     | 6.76       | 55.7         | 0.62            | 21.3           | 49.950     |
| 2     | 9.60       | 46.9         | 0.73            | 21.3           | 50.050     |
| Total |            | 102.6        |                 | 42.6           | 100.000    |

pankaj2-116.D [Prostar 335 Absorbance Analog Channel 1 EL06029028 ]

| Index | Time [Min] | Height [mAU] | Width USP [Min] | Area [mAU.Min] | Area % [%] |
|-------|------------|--------------|-----------------|----------------|------------|
| 1     | 6.79       | 201.7        | 0.62            | 76.8           | 90.981     |
| 2     | 9.67       | 18.1         | 0.68            | 7.6            | 9.019      |
| Total |            | 219.8        |                 | 84.4           | 100.000    |

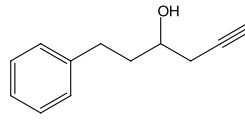

**31**

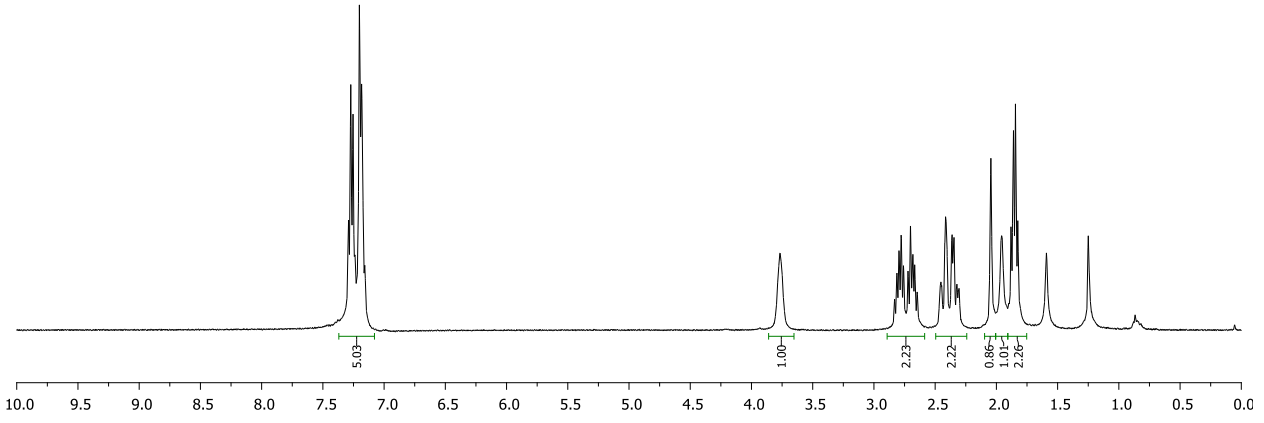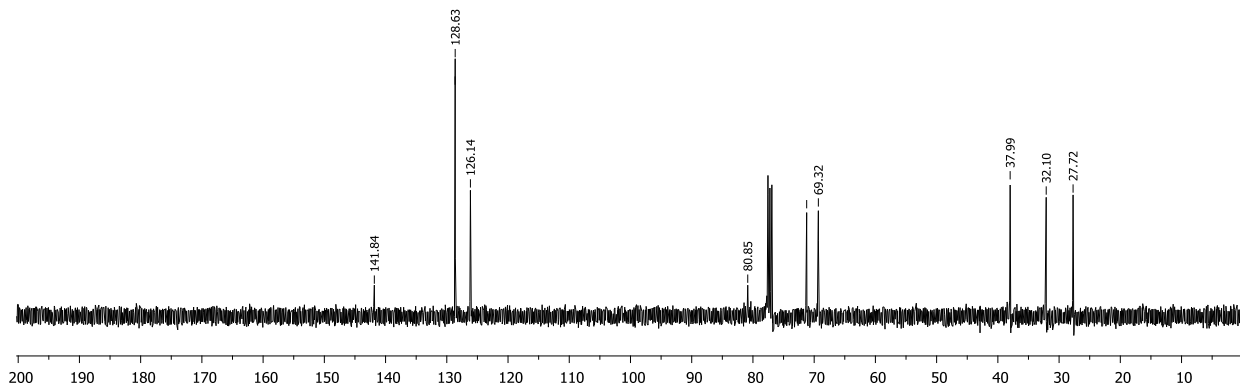

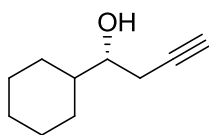

**(R)-1-Cyclohexyl-but-3-en-1-ol (3m):** Following the general procedure for the propargylation of aldehydes, the title compound was obtained in 89 % yield with spectral properties reported in literature.<sup>[3,10,11]</sup> Enantiomeric excess was determined to be 77 % by <sup>1</sup>H NMR of the crude material after esterification with (*R*)-MTPACl by comparing the singlets at  $\delta$  3.62 (major) and 3.54 (minor).<sup>[3]</sup>  $[\alpha]_D^{25} = +7.70$  ( $c = 0.35$ , CHCl<sub>3</sub>). The reported value<sup>11</sup> for the *R*-enantiomer (59% ee) is  $[\alpha]_D^{20} = +7$  ( $c = 0.1$ , CHCl<sub>3</sub>). <sup>1</sup>H NMR (400 MHz, CDCl<sub>3</sub>)  $\delta$  3.54-3.45 (m, 1H), 2.50 – 2.27 (m, 2H), 2.05 (t,  $J = 2.6$  Hz, 1H), 1.95 – 1.39 (m, 7H), 1.31 – 0.91 (m, 5H). <sup>13</sup>C NMR (100.6 MHz, CDCl<sub>3</sub>)  $\delta$  84.92, 74.23, 70.90, 42.72, 29.24, 28.39, 26.59, 26.33, 26.17, 24.85.

<sup>1</sup>H NMR of the crude **3m** after esterification with (*R*)-MTPACl

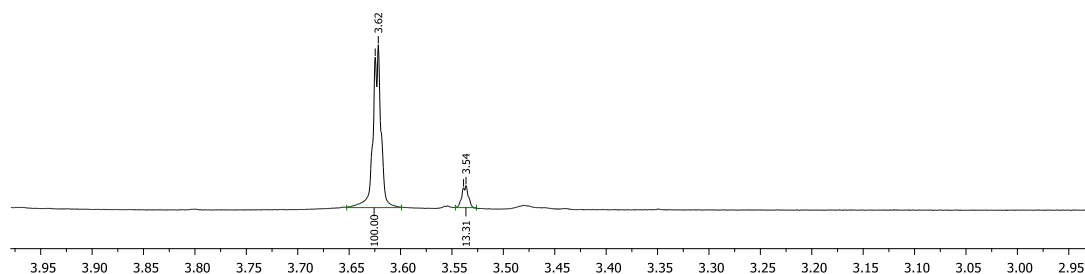

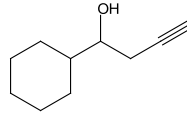

**3m**

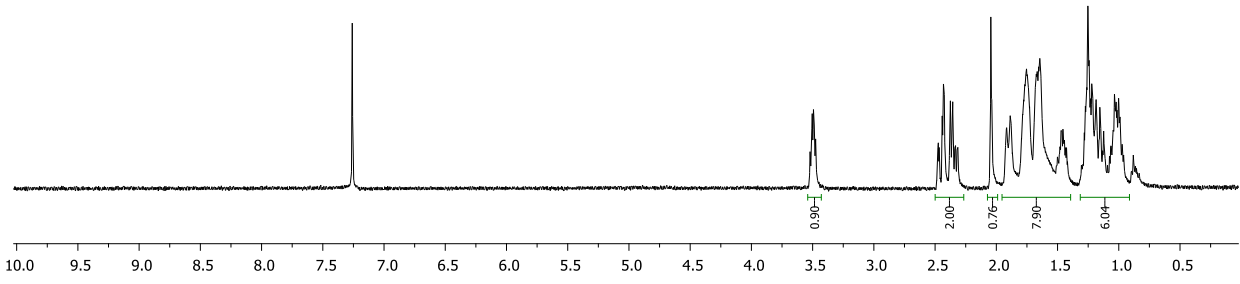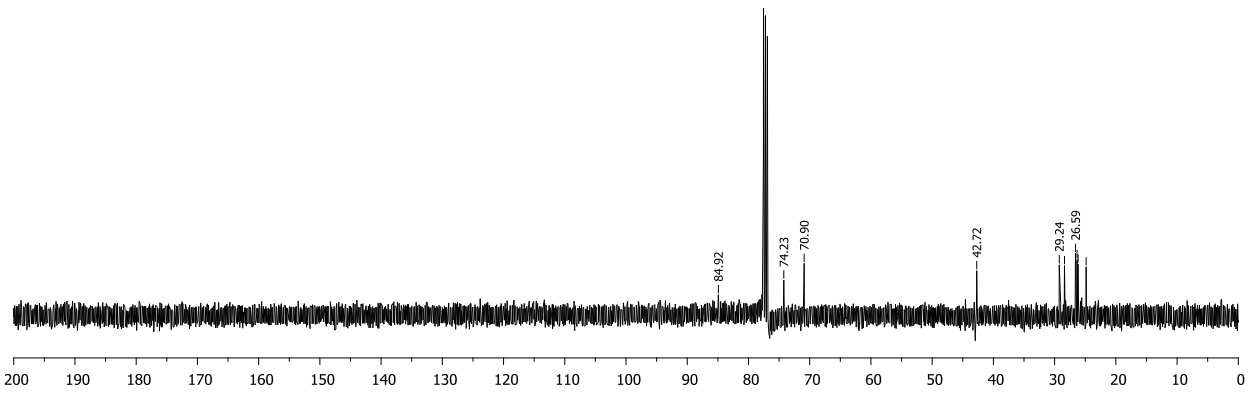

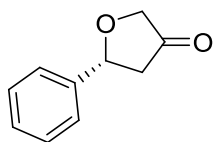

**(R)-5-phenyldihydrofuran-3-one (4):** Following Zhang's gold catalysis procedure,<sup>[7]</sup> while using 3,5-dichloropyridine *N*-oxide as the oxidant, the title compound was obtained in 54 % yield with spectral properties reported in literature.<sup>[7]</sup> Enantiomeric excess was determined by HPLC with a chiralcel OJ-H column (hexane/*i*PrOH = 90/10, 1.0 mL/min),  $t_{\text{minor}} = 20.27$  min,  $t_{\text{major}} = 21.41$  min; ee = 95 %.  $[\alpha]_{\text{D}}^{25} = +67.61$  ( $c = 1.00$ ,  $\text{CHCl}_3$ ).  $^1\text{H NMR}$  (400 MHz,  $\text{CDCl}_3$ )  $\delta$  7.40-7.32 (m, 5H), 5.29 (dd,  $J = 9.5, 6.3$  Hz, 1H), 4.25 (d,  $J = 17.0$  Hz, 1H), 4.02 (d,  $J = 17.0$  Hz, 1H), 2.87 (dd,  $J = 17.9, 6.3$  Hz, 1H), 2.55 (dd,  $J = 17.9, 9.5$  Hz, 1H).  $^{13}\text{C NMR}$  (100.6 MHz,  $\text{CDCl}_3$ )  $\delta$  214.38, 140.18, 128.94, 128.54, 126.07, 79.57, 71.95, 44.94.

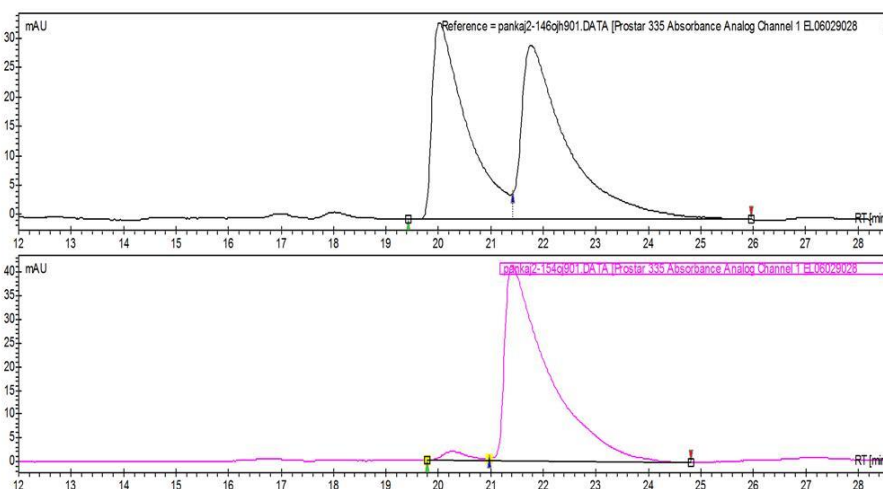

#### Peak results :

pankaj2-146ojh901.DATA [Prostar 335 Absorbance Analog Channel 1 EL06029028 ]

| Index | Time [Min] | Height [mAU] | Width USP [Min] | Area [mAU.Min] | Area % [%] |
|-------|------------|--------------|-----------------|----------------|------------|
| 1     | 20.01      | 33.4         | 1.13            | 25.3           | 45.822     |
| 2     | 21.77      | 29.6         | 1.32            | 29.9           | 54.178     |
| Total |            | 63.0         |                 | 55.1           | 100.000    |

pankaj2-154ojh901.DATA [Prostar 335 Absorbance Analog Channel 1 EL06029028 ]

| Index | Time [Min] | Height [mAU] | Width USP [Min] | Area [mAU.Min] | Area % [%] |
|-------|------------|--------------|-----------------|----------------|------------|
| 1     | 20.27      | 1.9          | 0.85            | 1.1            | 2.639      |
| 2     | 21.41      | 41.1         | 1.31            | 39.4           | 97.361     |
| Total |            | 43.0         |                 | 40.5           | 100.000    |

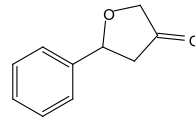

**4**

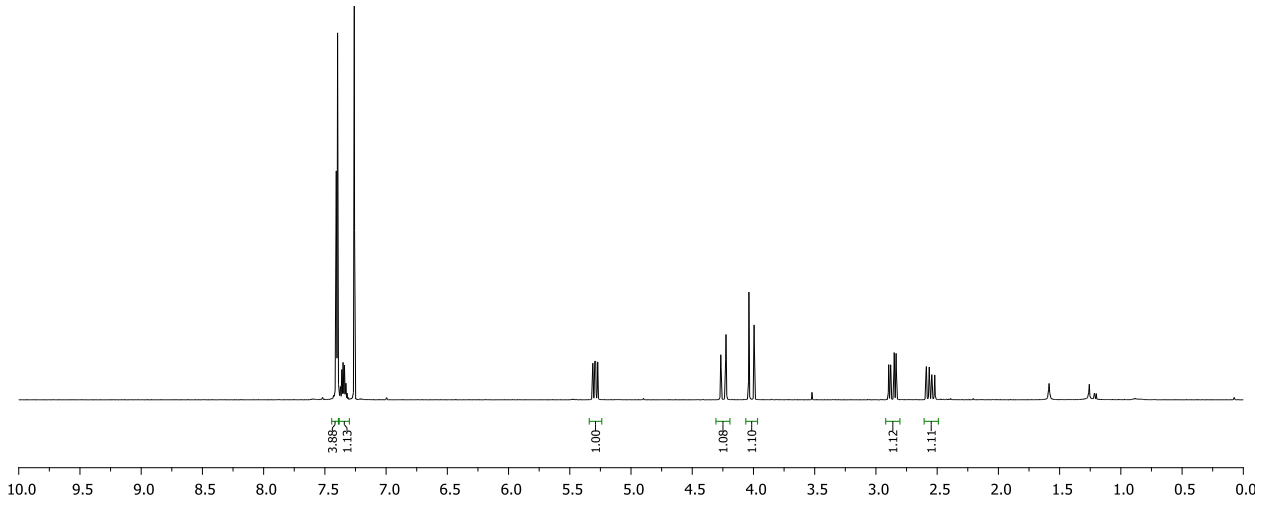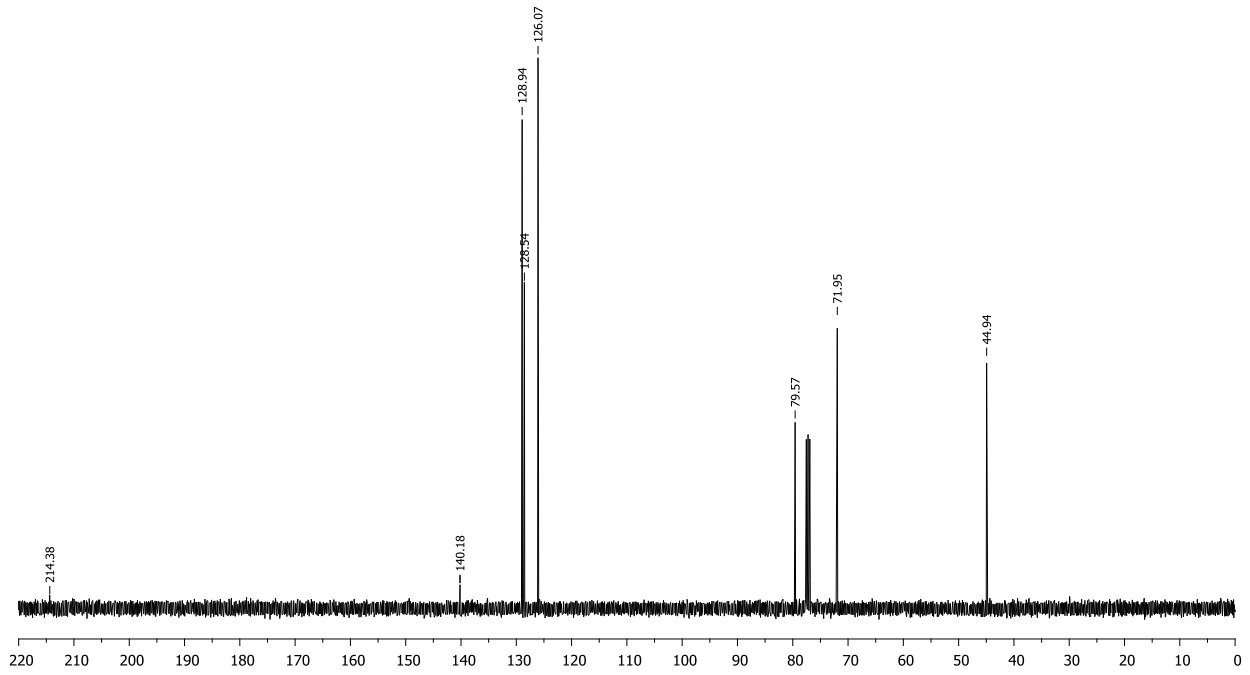

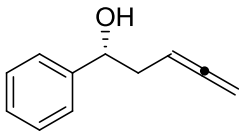

**(R)-1-phenylpenta-3,4-dien-1-ol (5):** Following the reported procedure<sup>[12]</sup> the title compound was obtained in 34 % yield with spectral properties reported in literature.<sup>[12,13]</sup> Enantiomeric excess was determined by HPLC with a chiralcel OD-H column (hexane/iPrOH = 90/10, 1.0 mL/min),  $t_{\text{major}} = 6.07$  min,  $t_{\text{minor}} = 7.01$  min; ee = 95 %.  $[\alpha]_{\text{D}}^{25} = +45.88$  (c = 0.60, CHCl<sub>3</sub>). <sup>1</sup>H NMR (400 MHz, CDCl<sub>3</sub>)  $\delta$  7.40 – 7.32 (m, 4H), 7.31 – 7.27 (m, 1H), 5.12 (p,  $J = 7.0$  Hz, 1H), 4.77 (t,  $J = 6.5$  Hz, 1H), 4.72 (dt,  $J = 6.7, 2.8$  Hz, 2H), 2.52 – 2.40 (m, 2H), 2.17 (br s, 1H). <sup>13</sup>C NMR (100.6 MHz, CDCl<sub>3</sub>)  $\delta$  209.70, 143.83, 128.63, 127.82, 126.06, 86.32, 75.28, 73.84, 38.70.

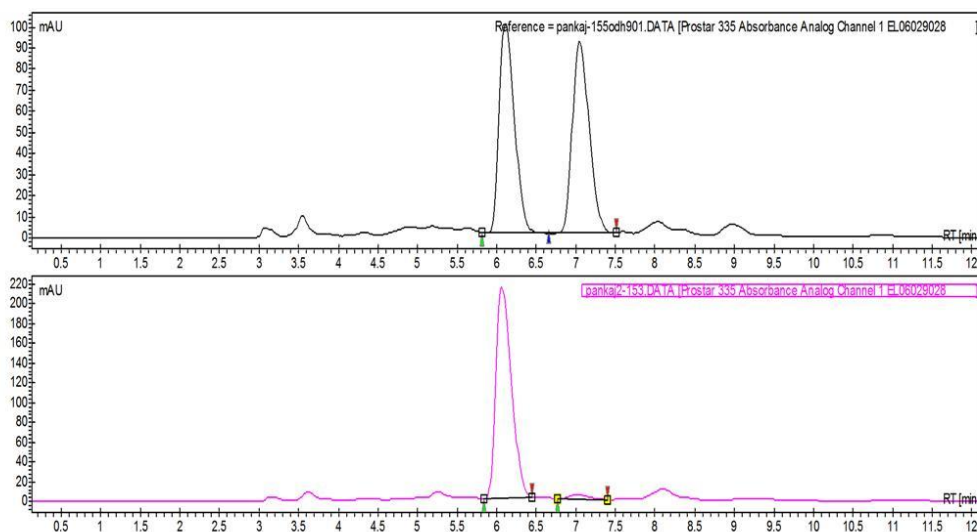

#### Peak results :

pankaj-1550dh901.DATA [Prostar 335 Absorbance Analog Channel 1 EL06029028 ]

| Index | Time [Min] | Height [mAU] | Width USP [Min] | Area [mAU.Min] | Area % [%] |
|-------|------------|--------------|-----------------|----------------|------------|
| 1     | 6.11       | 99.2         | 0.36            | 22.1           | 49.846     |
| 2     | 7.04       | 90.4         | 0.40            | 22.3           | 50.154     |
| Total |            | 189.7        |                 | 44.4           | 100.000    |

pankaj2-153.DATA [Prostar 335 Absorbance Analog Channel 1 EL06029028 ]

| Index | Time [Min] | Height [mAU] | Width USP [Min] | Area [mAU.Min] | Area % [%] |
|-------|------------|--------------|-----------------|----------------|------------|
| 2     | 6.07       | 213.7        | 0.37            | 48.7           | 97.559     |
| 1     | 7.01       | 4.8          | 0.40            | 1.2            | 2.441      |
| Total |            | 218.5        |                 | 49.9           | 100.000    |



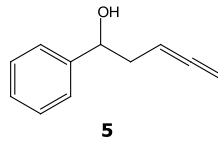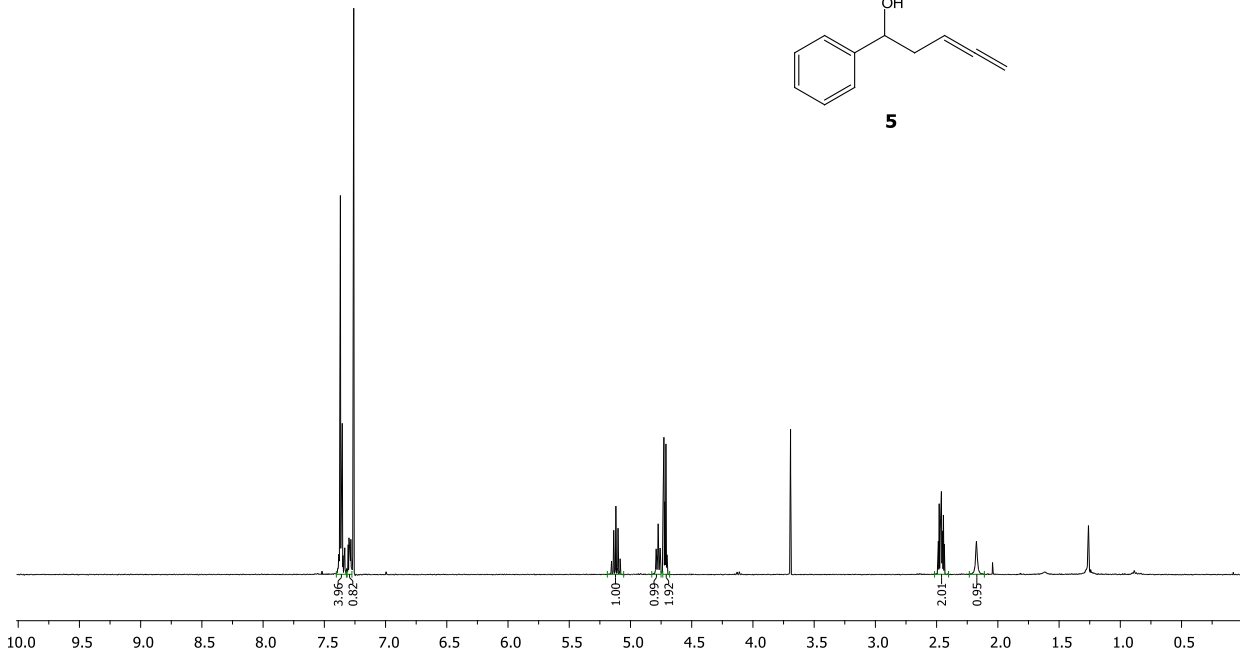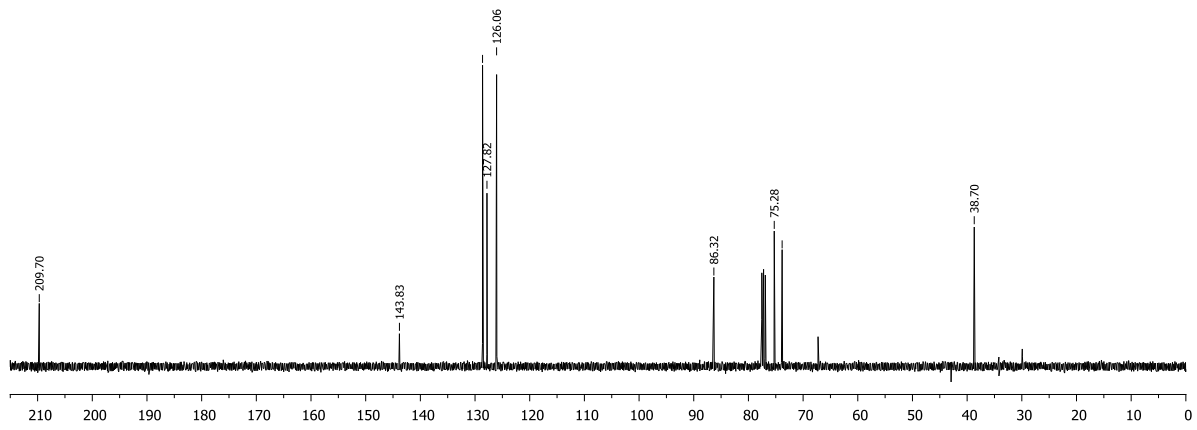

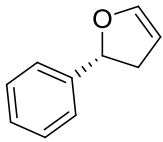

**(R)-2-phenyl-2,3-dihydrofuran (4):** Following the literature procedure,<sup>[14]</sup> the title compound was obtained in 61 % yield with spectral properties reported in literature.<sup>[15]</sup> Enantiomeric excess was determined to be >94 % by chiral GC (80 °C for 2 min, increase 1 °C/min for 38 min, cyclodex-B column),  $t_{\text{minor}} = 18.65$  min,  $t_{\text{major}} = 18.95$  min;  $[\alpha]_{\text{D}}^{25} = -28.10$  ( $c = 0.23$ ,  $\text{CHCl}_3$ ).  $^1\text{H}$  NMR (400 MHz,  $\text{CDCl}_3$ )  $\delta$  7.41 – 7.24 (m, 5H), 6.49 – 6.43 (m, 1H), 5.53 (dd,  $J = 10.7, 8.4$  Hz, 1H), 5.01 – 4.94 (m, 1H), 3.14 – 3.05 (m, 1H), 2.67 – 2.58 (m, 1H).  $^{13}\text{C}$  NMR (100.6 MHz,  $\text{CDCl}_3$ )  $\delta$  145.54, 143.26, 128.73, 127.84, 125.81, 99.24, 82.57, 38.07.

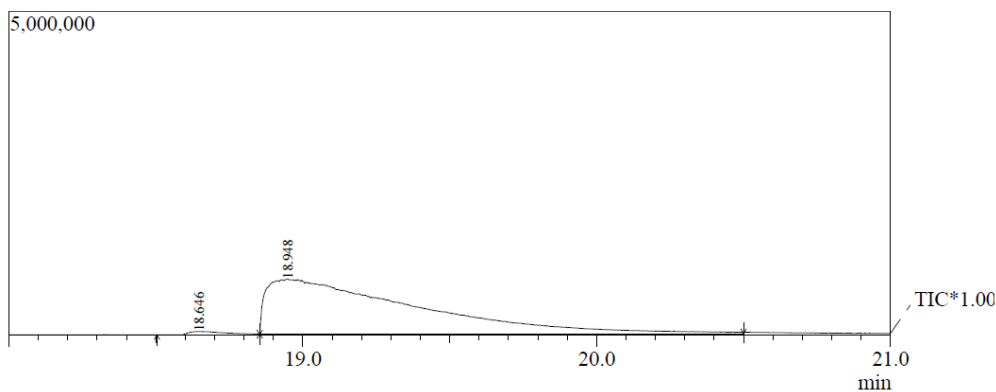

| Peak# | R.Time | Area%  | Name | Base m/z |
|-------|--------|--------|------|----------|
| 1     | 18.646 | 1.57   |      | 117.15   |
| 2     | 18.948 | 98.43  |      | 117.10   |
|       |        | 100.00 |      |          |

#### Spectrum

Peak#:1 R.Time:18.6(Scan#:4095)

MassPeaks:86

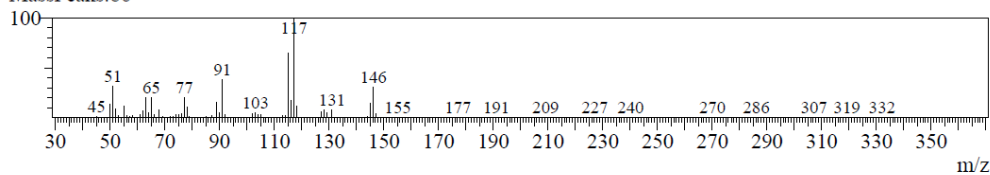

Peak#:2 R.Time:18.9(Scan#:4185)

MassPeaks:99

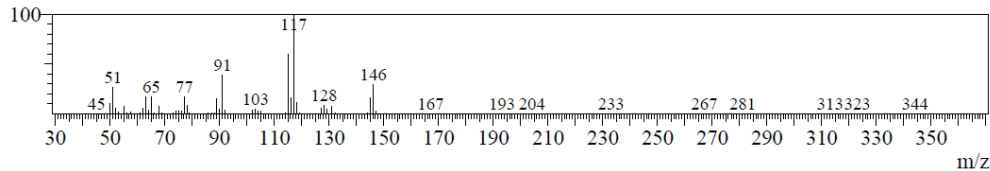

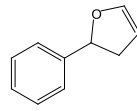

**6**

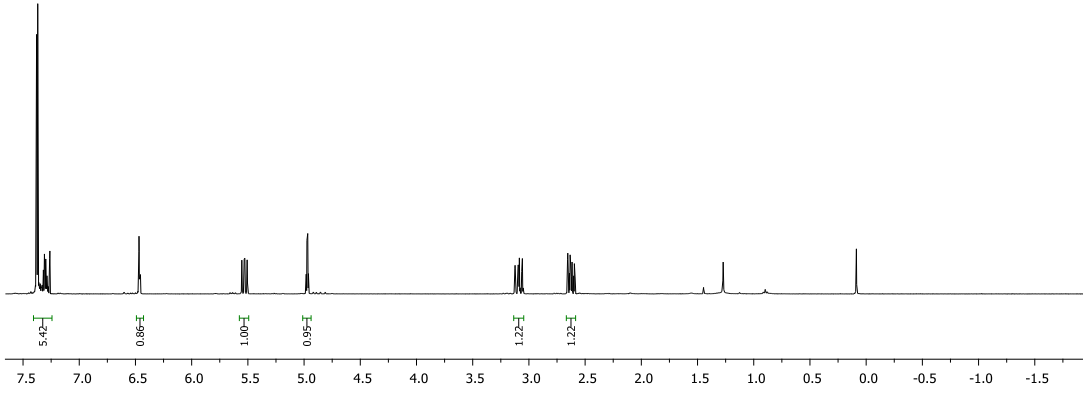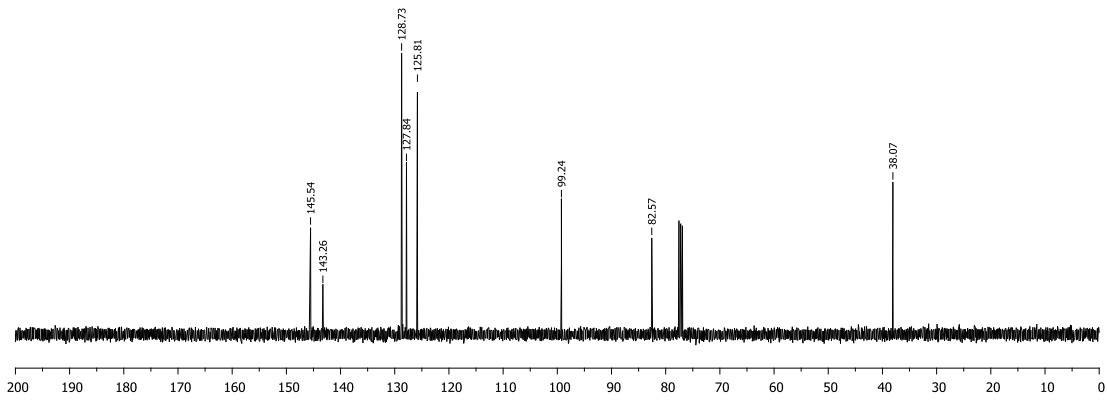

**Full reference 17:**

Gaussian 09, Revision A.02, M. J. Frisch, G. W. Trucks, H. B. Schlegel, G. E. Scuseria, M. A. Robb, J. R. Cheeseman, G. Scalmani, V. Barone, B. Mennucci, G. A. Petersson, H. Nakatsuji, M. Caricato, X. Li, H. P. Hratchian, A. F. Izmaylov, J. Bloino, G. Zheng, J. L. Sonnenberg, M. Hada, M. Ehara, K. Toyota, R. Fukuda, J. Hasegawa, M. Ishida, T. Nakajima, Y. Honda, O. Kitao, H. Nakai, T. Vreven, J. A. Montgomery, Jr., J. E. Peralta, F. Ogliaro, M. Bearpark, J. J. Heyd, E. Brothers, K. N. Kudin, V. N. Staroverov, R. Kobayashi, J. Normand, K. Raghavachari, A. Rendell, J. C. Burant, S. S. Iyengar, J. Tomasi, M. Cossi, N. Rega, J. M. Millam, M. Klene, J. E. Knox, J. B. Cross, V. Bakken, C. Adamo, J. Jaramillo, R. Gomperts, R. E. Stratmann, O. Yazyev, A. J. Austin, R. Cammi, C. Pomelli, J. W. Ochterski, R. L. Martin, K. Morokuma, V. G. Zakrzewski, G. A. Voth, P. Salvador, J. J. Dannenberg, S. Dapprich, A. D. Daniels, O. Farkas, J. B. Foresman, J. V. Ortiz, J. Cioslowski, and D. J. Fox, Gaussian, Inc., Wallingford CT, 2009.

**TSr1**

|   |             |             |             |
|---|-------------|-------------|-------------|
| B | 0.30191459  | 0.92047127  | 0.00000000  |
| C | 1.89522159  | 0.31233727  | 0.43231500  |
| C | 2.20439059  | 0.78524427  | 1.56587000  |
| C | 1.92930259  | 1.37711827  | 2.76708700  |
| H | 2.41691459  | -0.31066173 | -0.27917700 |
| H | 2.35492359  | 2.35323227  | 2.99862100  |
| H | 1.78930059  | 0.72553527  | 3.62759200  |
| O | 0.47330559  | 2.14798427  | -0.71072600 |
| C | -0.44184941 | 2.13853827  | -1.82233700 |
| O | -0.40132141 | -0.00186773 | -0.86570600 |
| C | -0.52048141 | 0.60817827  | -2.17939900 |
| C | -1.79028341 | 2.70511827  | -1.34373900 |
| H | -2.22307841 | 2.08319427  | -0.55459200 |
| H | -1.62155441 | 3.70615627  | -0.93341300 |
| H | -5.50372341 | 0.85729827  | 0.72497100  |
| C | 0.13200659  | 3.02449927  | -2.92846300 |
| H | 0.16610659  | 4.06346527  | -2.58408600 |
| H | 1.14904059  | 2.72652327  | -3.19344700 |
| H | -0.49214041 | 2.98767427  | -3.82913600 |
| C | -1.83717741 | 0.16407827  | -2.81289300 |
| H | -2.68300441 | 0.33588527  | -2.14346500 |
| H | -1.80275041 | -0.90433273 | -3.04713200 |
| H | -2.01674041 | 0.70460827  | -3.74972200 |
| C | 0.66332459  | 0.12798127  | -3.03196800 |
| H | 1.61496359  | 0.48608327  | -2.62827300 |
| H | 0.68113959  | -0.96690373 | -3.03584200 |
| H | 0.57860959  | 0.47093627  | -4.06877300 |
| O | -0.39797641 | 1.00672527  | 1.30118500  |
| C | 0.01466859  | 1.84562927  | 2.22095800  |
| H | 0.29298859  | 2.84157827  | 1.86386800  |
| C | -0.67936041 | 1.77607527  | 3.52906900  |
| C | -0.76527141 | 2.92345627  | 4.32889900  |
| C | -1.25172241 | 0.57123327  | 3.96776800  |
| C | -1.42520041 | 2.87403227  | 5.55636500  |
| C | -1.90597441 | 0.52868227  | 5.19655300  |
| C | -1.99588741 | 1.67621427  | 5.99142200  |
| H | -0.32496141 | 3.85676427  | 3.98414100  |
| H | -1.16324241 | -0.31701773 | 3.34812800  |
| H | -1.49693041 | 3.76846827  | 6.16917500  |
| H | -2.34751641 | -0.40435773 | 5.53562800  |
| H | -2.50967241 | 1.63624827  | 6.94831000  |
| H | -0.92909241 | -1.49323873 | -0.45325800 |
| O | -1.24637741 | -2.44184773 | -0.30714400 |
| P | -0.71923741 | -3.12618873 | 1.01429600  |
| O | -0.17909841 | -2.25910673 | 2.08228800  |
| O | 0.28546159  | -4.24603573 | 0.38926800  |
| O | -1.93966441 | -4.02810073 | 1.58473100  |
| C | 0.73628259  | -5.30944673 | 1.16710000  |
| C | -0.15719441 | -6.35107173 | 1.47598200  |
| C | 2.09874859  | -5.35361173 | 1.50386900  |
| C | 0.35018459  | -7.44992873 | 2.19062400  |
| C | 2.55910459  | -6.48845873 | 2.18677400  |

|   |             |             |             |
|---|-------------|-------------|-------------|
| C | 1.69383659  | -7.52204173 | 2.53986700  |
| H | -0.32821241 | -8.24744673 | 2.47700600  |
| H | 3.61238759  | -6.54623573 | 2.44514000  |
| H | 2.06751959  | -8.38267373 | 3.08737400  |
| C | -2.40890841 | -5.22648073 | 1.06069900  |
| C | -1.57534741 | -6.36053873 | 1.03162700  |
| C | -3.77053941 | -5.28128473 | 0.71396700  |
| C | -2.14442941 | -7.57028573 | 0.59549400  |
| C | -4.29375241 | -6.52078473 | 0.32249100  |
| C | -3.48824741 | -7.65545273 | 0.25140800  |
| H | -1.51098941 | -8.44881273 | 0.52308900  |
| H | -5.34702241 | -6.58107773 | 0.06402600  |
| H | -3.90696741 | -8.60329673 | -0.07464700 |
| C | 3.06265259  | -4.25555173 | 1.15757200  |
| C | 3.59206759  | -3.43947773 | 2.18506300  |
| C | 3.50696659  | -4.08437173 | -0.17599800 |
| C | 4.56872559  | -2.49067073 | 1.85665800  |
| C | 4.48143859  | -3.11781973 | -0.44675600 |
| C | 5.03864159  | -2.31648173 | 0.55470800  |
| H | 4.98428259  | -1.87077673 | 2.64809800  |
| H | 4.83263459  | -3.00627673 | -1.46988400 |
| C | -4.64955241 | -4.06579973 | 0.74426600  |
| C | -5.05489841 | -3.49981373 | 1.97474800  |
| C | -5.10331341 | -3.50191973 | -0.47346300 |
| C | -5.88136141 | -2.37067973 | 1.95826100  |
| C | -5.92848141 | -2.37335273 | -0.42980200 |
| C | -6.32424041 | -1.78306673 | 0.77274100  |
| H | -6.19252841 | -1.93210873 | 2.90403600  |
| H | -6.26267641 | -1.93773273 | -1.36842400 |
| C | 3.14979459  | -3.55467373 | 3.64474100  |
| C | 2.56173759  | -2.23380673 | 4.17655200  |
| C | 4.29828259  | -4.04991173 | 4.54601200  |
| H | 2.34951759  | -4.29734473 | 3.69937100  |
| H | 1.70862159  | -1.92328573 | 3.56676300  |
| H | 2.21823059  | -2.36584973 | 5.21020500  |
| H | 3.31024759  | -1.43163073 | 4.17814800  |
| H | 4.68930959  | -5.01621773 | 4.20735400  |
| H | 5.13474759  | -3.34065273 | 4.55631300  |
| H | 3.95005159  | -4.16868873 | 5.57919700  |
| C | 6.15201659  | -1.31968773 | 0.25483000  |
| C | 5.73995959  | -0.25904873 | -0.78236900 |
| C | 7.44311159  | -2.04020173 | -0.18058800 |
| H | 6.37207159  | -0.79178873 | 1.19304700  |
| H | 4.86175059  | 0.30387127  | -0.44882200 |
| H | 6.55592359  | 0.45474427  | -0.94804000 |
| H | 5.50064859  | -0.71606673 | -1.75012500 |
| H | 7.76181259  | -2.76937973 | 0.57225900  |
| H | 7.29650559  | -2.57853473 | -1.12458200 |
| H | 8.25836359  | -1.32152073 | -0.32837400 |
| C | 2.99678759  | -4.94878873 | -1.32888700 |
| C | 4.12501259  | -5.81122173 | -1.92917400 |
| C | 2.30083459  | -4.10833673 | -2.41621500 |
| H | 2.24906959  | -5.64026773 | -0.93132400 |
| H | 4.59121259  | -6.44214073 | -1.16400700 |
| H | 3.72960359  | -6.46602273 | -2.71513300 |
| H | 4.91283059  | -5.19363373 | -2.37648800 |
| H | 1.46384659  | -3.54341673 | -1.99453200 |
| H | 2.99461359  | -3.39998073 | -2.88502700 |
| H | 1.90794959  | -4.75865073 | -3.20734800 |
| C | -4.72164441 | -4.06838873 | -1.84226800 |
| C | -3.96716641 | -3.03674673 | -2.70011300 |
| C | -5.95136441 | -4.61937273 | -2.59009000 |
| H | -4.03627241 | -4.90552073 | -1.68749600 |

|                                               |             |             |              |
|-----------------------------------------------|-------------|-------------|--------------|
| H                                             | -3.07335341 | -2.68880073 | -2.17526100  |
| H                                             | -3.65845441 | -3.48600273 | -3.65231000  |
| H                                             | -4.59040841 | -2.16477973 | -2.93176700  |
| H                                             | -6.46451041 | -5.39103873 | -2.00462700  |
| H                                             | -6.68040441 | -3.82855073 | -2.80384800  |
| H                                             | -5.65143941 | -5.06324073 | -3.54726300  |
| C                                             | -4.66277241 | -4.09896573 | 3.32455400   |
| C                                             | -5.89431341 | -4.66900773 | 4.05674500   |
| C                                             | -3.90520241 | -3.09425173 | 4.21323800   |
| H                                             | -3.98645341 | -4.93864473 | 3.14247900   |
| H                                             | -6.40846841 | -5.41781673 | 3.44365300   |
| H                                             | -5.59430641 | -5.14708673 | 4.99731100   |
| H                                             | -6.61897841 | -3.88238973 | 4.29871200   |
| H                                             | -3.00601641 | -2.72922473 | 3.70835500   |
| H                                             | -4.53133241 | -2.23132173 | 4.47103000   |
| H                                             | -3.60052441 | -3.57440273 | 5.15144900   |
| C                                             | -7.19166341 | -0.53150473 | 0.80081600   |
| C                                             | -8.55022141 | -0.74470073 | 0.10806600   |
| C                                             | -6.44951241 | 0.67953427  | 0.20244700   |
| H                                             | -7.39376341 | -0.30350673 | 1.85648700   |
| H                                             | -9.09396241 | -1.58577573 | 0.55217000   |
| H                                             | -9.17491741 | 0.15216127  | 0.19868300   |
| H                                             | -8.42631441 | -0.95475573 | -0.96100500  |
| H                                             | -2.51702541 | 2.78847327  | -2.15823800  |
| H                                             | -6.21982041 | 0.51792227  | -0.85758400  |
| H                                             | -7.05882841 | 1.58859827  | 0.27736000   |
| Sum of electronic and zero-point Energies=    |             |             | -3146.510009 |
| Sum of electronic and thermal Energies=       |             |             | -3146.441101 |
| Sum of electronic and thermal Enthalpies=     |             |             | -3146.440156 |
| Sum of electronic and thermal Free Energies=  |             |             | -3146.617796 |
| Imaginary frequency: -365.06 cm <sup>-1</sup> |             |             |              |

## TSs1

|   |             |            |             |
|---|-------------|------------|-------------|
| B | -1.11729300 | 3.26467100 | -1.01100600 |
| C | -2.79932000 | 2.78956200 | -1.07105200 |
| C | -3.37098900 | 3.09539800 | 0.02050700  |
| C | -3.39167600 | 3.47921200 | 1.32939200  |
| H | -3.17200100 | 2.34024300 | -1.98042500 |
| H | -3.85606500 | 4.42338700 | 1.61108600  |
| H | -3.44543300 | 2.70009100 | 2.08856900  |
| O | -0.96357500 | 4.52917700 | -1.65233400 |
| C | 0.25270900  | 4.47670100 | -2.42585200 |
| O | -0.28312000 | 2.30873600 | -1.70893900 |
| C | 0.31722300  | 2.96241900 | -2.85844600 |
| C | 1.42489400  | 4.88378900 | -1.51581700 |
| H | 1.54894400  | 4.18095000 | -0.68707500 |
| H | 1.21350000  | 5.87217400 | -1.09473200 |
| H | 2.36924100  | 4.94302500 | -2.06829700 |
| C | 0.12467400  | 5.46733300 | -3.58345800 |
| H | 0.06941400  | 6.48647300 | -3.18669200 |
| H | -0.78090700 | 5.28549000 | -4.16684100 |
| H | 0.99195300  | 5.41185800 | -4.25208700 |
| C | 1.72492200  | 2.40010600 | -3.05234200 |
| H | 2.31843100  | 2.48039000 | -2.13922800 |
| H | 1.67089300  | 1.34129100 | -3.32765700 |
| H | 2.24663900  | 2.92942900 | -3.85821300 |
| C | -0.54924500 | 2.65235800 | -4.08762300 |
| H | -1.55369000 | 3.07307300 | -3.98189700 |
| H | -0.63989200 | 1.56700200 | -4.20044500 |
| H | -0.10376200 | 3.05222100 | -5.00487100 |
| O | -0.78881200 | 3.21835200 | 0.43827000  |
| C | -1.41334700 | 3.99652700 | 1.28412600  |
| H | -1.62567900 | 5.01108300 | 0.93274200  |

|   |             |             |             |
|---|-------------|-------------|-------------|
| C | -1.05623300 | 3.85272600  | 2.71436900  |
| C | -1.37133200 | 4.88678900  | 3.60862800  |
| C | -0.39441300 | 2.70338200  | 3.17483300  |
| C | -1.03296200 | 4.77604600  | 4.95523800  |
| C | -0.06071700 | 2.60081800  | 4.52429500  |
| C | -0.37882000 | 3.62991200  | 5.41509400  |
| H | -1.87396700 | 5.78083400  | 3.24506600  |
| H | -0.13370800 | 1.91224600  | 2.47672700  |
| H | -1.27324200 | 5.58211900  | 5.64305400  |
| H | 0.45750500  | 1.71410400  | 4.87795800  |
| H | -0.11248700 | 3.54262200  | 6.46516800  |
| H | -0.22440500 | 0.75601900  | -1.35521700 |
| O | -0.25802200 | -0.24980800 | -1.23156200 |
| P | 0.30107700  | -0.78901200 | 0.13976500  |
| O | 0.68518300  | 0.18465400  | 1.18202600  |
| O | 1.46252400  | -1.78935800 | -0.40786000 |
| O | -0.80872300 | -1.82300100 | 0.72655200  |
| C | 2.00696300  | -2.76345800 | 0.42400200  |
| C | 1.23450900  | -3.89560400 | 0.73384100  |
| C | 3.34931300  | -2.62822200 | 0.81252100  |
| C | 1.83460200  | -4.89671700 | 1.51625400  |
| C | 3.90765400  | -3.66569800 | 1.57184900  |
| C | 3.15614500  | -4.78294800 | 1.93437200  |
| H | 1.24669000  | -5.76445200 | 1.79959000  |
| H | 4.94715100  | -3.58537000 | 1.87613000  |
| H | 3.60404900  | -5.56730000 | 2.53800300  |
| C | -1.10777200 | -3.06499700 | 0.17912500  |
| C | -2.42669300 | -3.28617800 | -0.25168300 |
| C | -0.14185200 | -4.08922600 | 0.20824700  |
| C | -2.75995900 | -4.57829900 | -0.68290800 |
| C | -0.52328800 | -5.35898300 | -0.25685200 |
| C | -1.81849000 | -5.60511200 | -0.69726400 |
| H | -3.77907900 | -4.76898000 | -1.00591200 |
| H | 0.21784400  | -6.15208500 | -0.27653900 |
| H | -2.09557500 | -6.59466400 | -1.04947100 |
| C | 4.18344300  | -1.44630600 | 0.41239500  |
| C | 4.46706800  | -0.42778200 | 1.35068100  |
| C | 4.73038800  | -1.37593200 | -0.89229200 |
| C | 5.29439300  | 0.63349800  | 0.96197100  |
| C | 5.54439900  | -0.29015300 | -1.22696200 |
| C | 5.84252200  | 0.72764800  | -0.31648700 |
| H | 5.51595100  | 1.41809400  | 1.68209000  |
| H | 5.96319400  | -0.24280400 | -2.22948000 |
| C | -3.49293200 | -2.22805100 | -0.23378200 |
| C | -3.97924800 | -1.69839100 | -1.45393800 |
| C | -4.09265400 | -1.84063300 | 0.98675700  |
| C | -5.07735200 | -0.83142100 | -1.42767400 |
| C | -5.18157600 | -0.96125100 | 0.95443900  |
| C | -5.70586200 | -0.45775300 | -0.23698500 |
| H | -5.45964300 | -0.44853800 | -2.37079500 |
| H | -5.65510800 | -0.67683400 | 1.89192700  |
| C | 6.73398900  | 1.90257100  | -0.69660000 |
| C | 6.11330800  | 2.75268400  | -1.82157400 |
| C | 8.15781000  | 1.44888600  | -1.07060400 |
| H | 6.81648500  | 2.54428600  | 0.19133800  |
| H | 5.11586500  | 3.10962100  | -1.54207000 |
| H | 6.74058700  | 3.62565500  | -2.03980800 |
| H | 6.01342300  | 2.17428700  | -2.74783900 |
| H | 8.61681600  | 0.87551500  | -0.25777300 |
| H | 8.15108700  | 0.81353900  | -1.96422500 |
| H | 8.79761300  | 2.31418400  | -1.28240700 |
| C | 3.91388600  | -0.43891800 | 2.77602700  |
| C | 3.13574800  | 0.84875900  | 3.10687100  |

|                                               |             |             |              |
|-----------------------------------------------|-------------|-------------|--------------|
| C                                             | 5.03227000  | -0.68755000 | 3.80722400   |
| H                                             | 3.20213200  | -1.26565700 | 2.85582100   |
| H                                             | 2.32088600  | 0.99736000  | 2.39406000   |
| H                                             | 2.70752900  | 0.77628100  | 4.11493700   |
| H                                             | 3.78267200  | 1.73398300  | 3.09084400   |
| H                                             | 5.55337700  | -1.63329900 | 3.61893000   |
| H                                             | 5.78081500  | 0.11346700  | 3.78077000   |
| H                                             | 4.61871600  | -0.72496100 | 4.82250400   |
| C                                             | 4.49199600  | -2.46010800 | -1.94354600  |
| C                                             | 5.80256200  | -3.18389000 | -2.31181700  |
| C                                             | 3.79366800  | -1.90350500 | -3.19879000  |
| H                                             | 3.82539200  | -3.21319800 | -1.51431600  |
| H                                             | 6.27779300  | -3.61885200 | -1.42539500  |
| H                                             | 5.60582200  | -3.99384300 | -3.02478900  |
| H                                             | 6.52430200  | -2.50065900 | -2.77493400  |
| H                                             | 2.84190700  | -1.43166100 | -2.93651300  |
| H                                             | 4.41662200  | -1.16058900 | -3.71157600  |
| H                                             | 3.58979600  | -2.71223000 | -3.91137200  |
| C                                             | -6.95561100 | 0.41377400  | -0.22579100  |
| C                                             | -8.17429700 | -0.36455600 | -0.76213300  |
| C                                             | -6.78106900 | 1.74100200  | -0.98498300  |
| H                                             | -7.16431000 | 0.66277700  | 0.82399000   |
| H                                             | -8.33585000 | -1.28715000 | -0.19408900  |
| H                                             | -9.08474400 | 0.24349300  | -0.69476600  |
| H                                             | -8.03213600 | -0.64149400 | -1.81368700  |
| H                                             | -5.94810800 | 2.32679500  | -0.58057600  |
| H                                             | -6.58814800 | 1.57404100  | -2.05134800  |
| H                                             | -7.69148900 | 2.34754800  | -0.90849500  |
| C                                             | -3.35312200 | -2.04320000 | -2.80626900  |
| C                                             | -2.89751000 | -0.78420200 | -3.56816900  |
| C                                             | -4.30362800 | -2.89142300 | -3.67441300  |
| H                                             | -2.45555500 | -2.64044000 | -2.62153000  |
| H                                             | -2.19988800 | -0.19842800 | -2.96289400  |
| H                                             | -2.38849100 | -1.06876700 | -4.49722300  |
| H                                             | -3.74487100 | -0.14350300 | -3.84254300  |
| H                                             | -4.59133300 | -3.81920800 | -3.16775000  |
| H                                             | -5.22425800 | -2.34369300 | -3.90927700  |
| H                                             | -3.82284400 | -3.15921200 | -4.62311300  |
| C                                             | -3.62709400 | -2.37575300 | 2.34041700   |
| C                                             | -4.72110100 | -3.22602500 | 3.01671400   |
| C                                             | -3.14517900 | -1.24586400 | 3.26956600   |
| H                                             | -2.77243100 | -3.03573900 | 2.17049100   |
| H                                             | -5.03173200 | -4.05713700 | 2.37353800   |
| H                                             | -4.35117100 | -3.64631300 | 3.95982300   |
| H                                             | -5.61303200 | -2.63042100 | 3.24500500   |
| H                                             | -2.33073000 | -0.67997800 | 2.80729400   |
| H                                             | -3.95642200 | -0.54821200 | 3.51129900   |
| H                                             | -2.77648200 | -1.66230300 | 4.21487400   |
| Sum of electronic and zero-point Energies=    |             |             | -3146.508455 |
| Sum of electronic and thermal Energies=       |             |             | -3146.439604 |
| Sum of electronic and thermal Enthalpies=     |             |             | -3146.438660 |
| Sum of electronic and thermal Free Energies=  |             |             | -3146.615719 |
| Imaginary frequency: -356.96 cm <sup>-1</sup> |             |             |              |



## References

- [1] S. E. Denmark, T. Wynn, *J. Am. Chem. Soc.* **2001**, *123*, 6199–6200.
- [2] L. C. Hirayama, K. K. Dunham, B. Singaram, *Tetrahedron Lett.* **2006**, *4*, 5173-5176.
- [3] D. L. Usanov, H. Yamamoto, *Angew. Chem.* **2010**, *122*, 8245 – 8248; *Angew. Chem. Int. Ed.* **2010**, *49*, 8169 – 8172
- [4] B. M. Trost, M.-Y. Ngai, G. Dong, G. *Org. Lett.* **2011**, *13*, 1900-1903
- [5] M. L. Maddess, M. Lautens, *Org. Lett.* **2005**, *7*, 3557-3560.
- [6] X. Ma, J.-X. Wang, S. Li, K.-H Wang, D. Huang, *Tetrahedron* **2009**, *65*, 8683-8689.
- [7] L. Ye, L. Cui, G. Zhang, L. Zhang, *J. Am. Chem. Soc.* **2010**, *132*, 3258-3259.
- [8] Q.-R. Li, C.-Z. Gu, H. Yin, *Chin. J. Chem.* **2006**, *24*, 72-78.
- [9] N. Minowa, T. Mukaiyama, *T. Bull. Chem. Soc. Jpn.* **1987**, *60*, 3697–3704.
- [10] J. Tummatorn, G. B. Dudley, *J. Am. Chem. Soc.* **2008**, *130*, 5050-5051.
- [11] J. Chen, B. Captain, N. Takenaka, *Org. Lett.* **2011**, *13*, 1654-1657.
- [12] X. Cheng, X. Jiang, Y. Yu, S. Ma. *J. Org. Chem.* **2008**, *73*, 8960-8965.
- [13] V. Coeffard, M. Aylward, P. J. Guiry, *Angew. Chem.* **2009**, *121*, 9316-9319; *Angew. Chem., Int. Ed.* **2009**, *48*, 9152-9155.
- [14] F. E. McDonald, C. B. Connolly, M. M. Gleason, T. B. Towne, K. D. Treiber, *J. Org. Chem.* **1993**, *58*, 6952.
- [15] W.-M. Dai, K. K. Y. Yeung, Y. Wang, *Tetrahedron* **2004**, *60*, 4425-4430.
